# Supplementary material for: Synthesis, structure elucidation and functionalization of sulfonamide [2]catenanes
Source: Royal Society of Chemistry journal article supplement (doi:10.1039/d1qo00691f), 2021-01-01
Supplement: d1qo00691f1.pdf [file d1qo00691f1.pdf]

# Synthesis, Structure Elucidation, and Functionalization of Sulfonamide Catenanes

Yu Wang<sup>a</sup>, Shuai Lu<sup>b</sup>, Xu-Qing Wang<sup>a</sup>, Yan-Fei Niu<sup>a</sup>, Heng Wang<sup>b\*</sup>, Wei Wang<sup>a\*</sup>

<sup>a</sup> School of Chemistry and Molecular Engineering, East China Normal University, 3663 N. Zhongshan Road, Shanghai 200062, P. R. China

<sup>b</sup> College of Chemistry and Environmental Engineering, Shenzhen University, Shenzhen, Guangdong 518055, China

\* Corresponding authors.

E-mail: [wwang@chem.ecnu.edu.cn](mailto:wwang@chem.ecnu.edu.cn) (W. W.); [hengwang@szu.edu.cn](mailto:hengwang@szu.edu.cn) (H. W.)

## **Table of Contents**

**Section A.** Materials and general methods.

**Section B.** Synthesis and characterization of [2]catenanes **3** and **6**.

**Section C.** CID/IMS measurements of [2]catenanes **3** and **6**.

**Section D.** Synthesis and photophysical properties of pyrene-functionalized [2]catenane **7** and macrocycle **8**.

**Section E.** DFT results and computational details.

**Section F.** References

## Section A. Materials and general methods.

All reagents were commercially available and used as supplied without further purification. Deuterated solvents were purchased from Cambridge Isotope Laboratory. Compounds **B** and **C** were prepared according to the published procedures.<sup>S1-S3</sup>

All solvents were dried according to standard procedures and all of them were degassed under N<sub>2</sub> for 30 minutes before use. All reactions were carried out under inert N<sub>2</sub> atmosphere. <sup>1</sup>H NMR; <sup>13</sup>C NMR spectra were recorded on Bruker 400 MHz Spectrometer (<sup>1</sup>H: 400 MHz) and Bruker 500 MHz Spectrometer (<sup>1</sup>H: 500 MHz; <sup>13</sup>C: 126 MHz) at 298 K. The <sup>1</sup>H and <sup>13</sup>C NMR chemical shifts are reported relative to residual solvent signals. 2D-NMR spectra (<sup>1</sup>H-<sup>1</sup>H COSY, NOESY) were recorded on Bruker 400 MHz Spectrometer (<sup>1</sup>H: 400 MHz) and Bruker 500 MHz Spectrometer (<sup>1</sup>H: 500MHz) at 298 K.

ESI-MS was conducted on Waters Synapt G2-Si mass spectrometer with traveling wave ion mobility. The IM-MS experiments for complexes were performed under the following conditions: ESI capillary voltage, 3.0 kV; sample cone voltage, 20 V; extraction cone voltage, 1.0 V; source temperature 100 °C; desolvation temperature, 120 °C; cone gas flow, 10 L/h; desolvation gas flow, 700 L/h (N<sub>2</sub>); source gas control, 0 mL/min; trap gas control, 2 mL/min; Helium cell gas control, 100 mL/min; ion mobility (IM) cell gas control, 30 mL/min; sample flow rate, 5 μL/min; IM traveling wave height, 25 V; and IM traveling wave velocity, 1000 m/s.

UV-vis spectra and steady-state fluorescence spectra were recorded in a quartz cell (light path 10 mm) on a Shimadzu UV2700 UV-visible spectrophotometer and a Shimadzu RF-6000 fluorescence spectrophotometer.

All calculations were performed with the Gaussian 09 program.<sup>S4</sup> The B3LYP functional was utilized for geometry optimization.<sup>S5-S7</sup> The 6-31G\* basis set was considered for all atoms.

## Section B. Synthesis and characterization of [2]catenanes **3** and **6**.

**Scheme S1.** The synthesis route of [2]catenanes **3** and **6**.

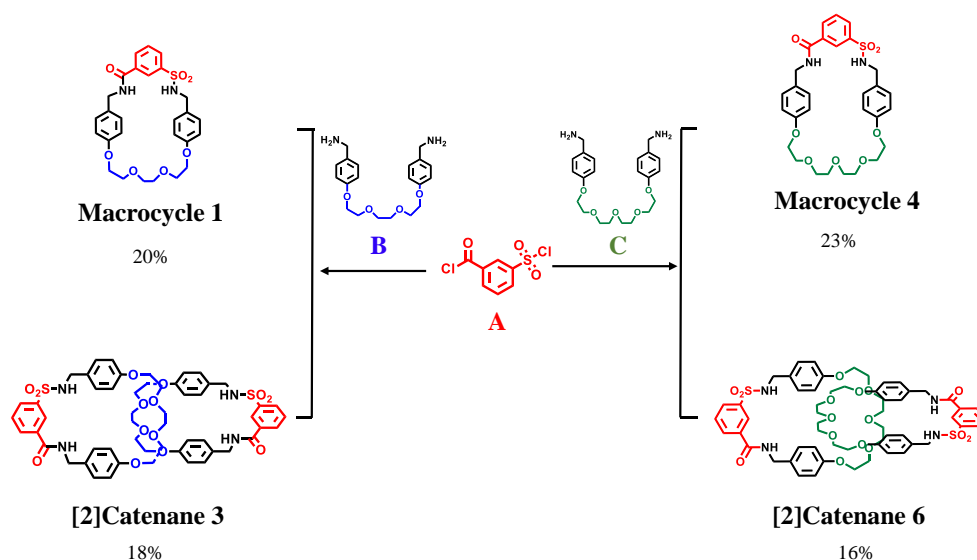

**Synthesis of macrocycle 1 and [2]catenane 3:** **B** (0.360 g, 1.00 mmol, 1 eq.) in  $\text{CHCl}_3$  (dry, 40 mL) and **A** (0.239 g, 1.00 mmol, 1 eq.) in  $\text{CHCl}_3$  (dry, 40 mL) were added simultaneously *via* syringe pump to  $\text{NEt}_3$  (0.7 mL, 5 mmol, 5 eq.) in  $\text{CHCl}_3$  (dry, 160 mL) over 4 h at room temperature under  $\text{N}_2$  before stirring for an additional 16 h. The reaction mixture was washed with 1 M  $\text{HCl}$  (aq.) (100 mL), 1 M  $\text{KOH}$  (aq.) (100 mL) and brine (100 mL), dried ( $\text{MgSO}_4$ ) and the solvent removed *in vacuo*. The solution was concentrated and the residue was purified by column chromatography ( $\text{SiO}_2$ ;  $\text{DCM}/\text{Acetone} = 10:1$  for **1**,  $\text{DCM}/\text{Acetone} = 5:1$  for **3**). Both **1** and **3** were obtained as white solids.

**Macrocycle 1** (120 mg, 20%):  $^1\text{H}$  NMR (500 MHz,  $\text{DMSO}-d_6$ )  $\delta$  9.12-9.14 (t,  $J = 5.0$  Hz, 1H), 8.23 (s, 1H), 8.15-8.17 (t,  $J = 5.0$  Hz, 1H), 7.98-8.00 (d,  $J = 10.0$  Hz, 1H), 7.83-7.85 (d,  $J = 10.0$  Hz, 2H), 7.53-7.56 (t,  $J = 5.0$  Hz, 1H), 7.24-7.26 (d,  $J = 10.0$  Hz, 2H), 6.94-6.95 (d,  $J = 10.0$  Hz, 2H), 6.84-6.86 (d,  $J = 10.0$  Hz, 2H), 6.45-6.47 (d,  $J = 10.0$  Hz, 2H), 4.41-4.42 (d,  $J = 5.0$  Hz, 2H), 4.14-4.15 (m, 2H), 4.08-4.09 (d,  $J = 5.0$  Hz, 2H), 3.72-3.74 (m, 4H), 3.58-3.62 (m, 4H), 3.52-3.53 (m, 2H).  $^{13}\text{C}$  NMR (126 MHz,  $\text{DMSO}-d_6$ )  $\delta$  164.69, 158.04, 157.86, 142.28, 135.12, 132.34, 130.87, 129.56, 129.46, 129.36, 129.06, 128.85, 126.13, 115.35, 114.16, 70.70, 70.22, 69.31, 69.20, 67.99, 67.43, 46.23, 42.50, 31.17. HRMS (ESI-TOF): Calculated for [**1** +  $\text{Na}$ ] $^+$ : 549.1666; Found: 549.1672.

**[2]Catenane 3** (108 mg, 18%):  $^1\text{H}$  NMR (500 MHz,  $\text{DMSO}-d_6$ )  $\delta$  9.17-9.20 (t,  $J = 10.0$  Hz, 2H), 8.25 (s, 2H), 8.14-8.16 (t,  $J = 5.0$  Hz, 2H), 8.06-8.08 (d,  $J = 10.0$  Hz, 2H), 7.87-7.88 (d,  $J = 5.0$  Hz, 2H), 7.61-7.64 (t,  $J = 10.0$  Hz, 2H), 7.23-7.25 (d,  $J = 10.0$  Hz, 4H), 7.04-7.06 (d,  $J = 10.0$  Hz, 4H), 6.89-6.90 (d,  $J = 5.0$  Hz, 4H), 6.73-6.74 (d,  $J = 5.0$  Hz, 4H), 4.41-4.42 (d,  $J = 5.0$  Hz, 4H), 4.04-4.06 (m, 4H), 3.94-3.98 (m, 8H), 3.68-3.73 (m, 8H), 3.58-3.59 (m, 8H).  $^{13}\text{C}$  NMR (126 MHz,  $\text{DMSO}-d_6$ )  $\delta$

165.13, 158.03, 157.60, 141.68, 135.50, 131.93, 131.21, 129.76, 129.41, 128.56, 128.38, 126.98, 125.95, 114.76, 114.57, 69.97, 69.31, 67.97, 67.53, 56.30, 46.12, 43.07, 42.68, 32.38, 31.93, 30.30. HRMS (ESI-TOF): Calculated for [**3** + Na]<sup>+</sup>: 1075.3440; Found: 1075.3991.

**Synthesis of macrocycle 4 and [2]catenane 6:** **C** (0.404 g, 1.00 mmol, 1 eq.) in CHCl<sub>3</sub> (dry, 40 mL) and **A** (0.239 g, 1.00 mmol, 1 eq.) in CHCl<sub>3</sub> (dry, 40 mL) were added simultaneously via syringe pump to NEt<sub>3</sub> (0.7 mL, 5 mmol, 5 eq.) in CHCl<sub>3</sub> (dry, 160 mL) over 4 h at room temperature under N<sub>2</sub> before stirring for an additional 16 h. The reaction mixture was washed with 1 M HCl (aq) (100 mL), 1 M KOH (aq) (100 mL) and brine (100 mL), dried (MgSO<sub>4</sub>) and the solvent removed *in vacuo*. The solution was concentrated and the residue was purified by column chromatography (SiO<sub>2</sub>; DCM/Acetone = 10:1 for **4**, DCM/Acetone = 5:1 for **6**). Both **4** and **6** were obtained as white solids.

**Macrocycle 4** (147 mg, 23%): <sup>1</sup>H NMR (500 MHz, DMSO-*d*<sub>6</sub>) δ 9.12-9.15 (t, *J* = 10.0 Hz, 1H), 8.22 (s, 1H), 8.13-8.15 (t, *J* = 5.0 Hz, 1H), 7.99-8.01 (d, *J* = 10.0 Hz, 1H), 7.83-7.84 (d, *J* = 5.0 Hz, 2H), 7.54-7.57 (t, *J* = 10.0 Hz, 1H), 7.25-7.27 (d, *J* = 10.0 Hz, 2H), 6.91-6.93 (d, *J* = 10.0 Hz, 2H), 6.87-6.88 (d, *J* = 5.0 Hz, 2H), 6.50-6.52 (d, *J* = 10.0 Hz, 2H), 4.41-4.42 (d, *J* = 10.0 Hz, 2H), 4.06-4.09 (m, 4H), 3.73-3.78 (d, 4H), 3.53-3.63 (m, 10H). <sup>13</sup>C NMR (126 MHz, DMSO-*d*<sub>6</sub>) δ 164.81, 157.95, 157.84, 142.05, 135.18, 132.18, 130.98, 129.54, 129.37, 129.13, 128.85, 126.03, 114.77, 114.18, 70.59, 70.44, 70.31, 70.26, 69.27, 67.78, 67.45, 46.26, 42.52. HRMS (ESI-TOF): Calculated for [**4** + Na]<sup>+</sup>: 593.1928; Found: 593.1912.

**[2]Catenane 6** (103 mg, 16%): <sup>1</sup>H NMR (500 MHz, DMSO-*d*<sub>6</sub>) δ 9.18-9.20 (t, *J* = 5.0 Hz, 2H), 8.26 (s, 2H), 8.14-8.16 (t, *J* = 5.0 Hz, 2H), 8.06-8.07 (d, *J* = 5.0 Hz, 2H), 7.88-7.89 (d, *J* = 5.0 Hz, 2H), 7.61-7.65 (t, *J* = 10.0 Hz, 2H), 7.23-7.25 (d, *J* = 10.0 Hz, 4H), 7.06-7.07 (d, *J* = 5.0 Hz, 4H), 6.88-6.90 (d, *J* = 10.0 Hz, 4H), 6.74-6.76 (d, *J* = 10.0 Hz, 4H), 4.41-4.42 (d, *J* = 5.0 Hz, 4H), 4.03-4.05 (t, *J* = 5.0 Hz, 4H), 3.94-3.98 (m, 8H), 3.68-3.71 (m, 8H), 3.53-3.55 (m, 16H). <sup>13</sup>C NMR (126 MHz, DMSO-*d*<sub>6</sub>) δ 165.16, 158.05, 157.92, 141.65, 135.52, 131.91, 131.22, 129.77, 129.65, 129.41, 129.18, 128.65, 128.41, 126.98, 125.96, 114.75, 114.57, 114.26, 70.40, 70.31, 69.38, 69.35, 67.60, 67.54, 46.12, 42.70. HRMS (ESI-TOF): Calculated for [**6** + Na]<sup>+</sup>: 1163.3964; Found: 1163.3986.

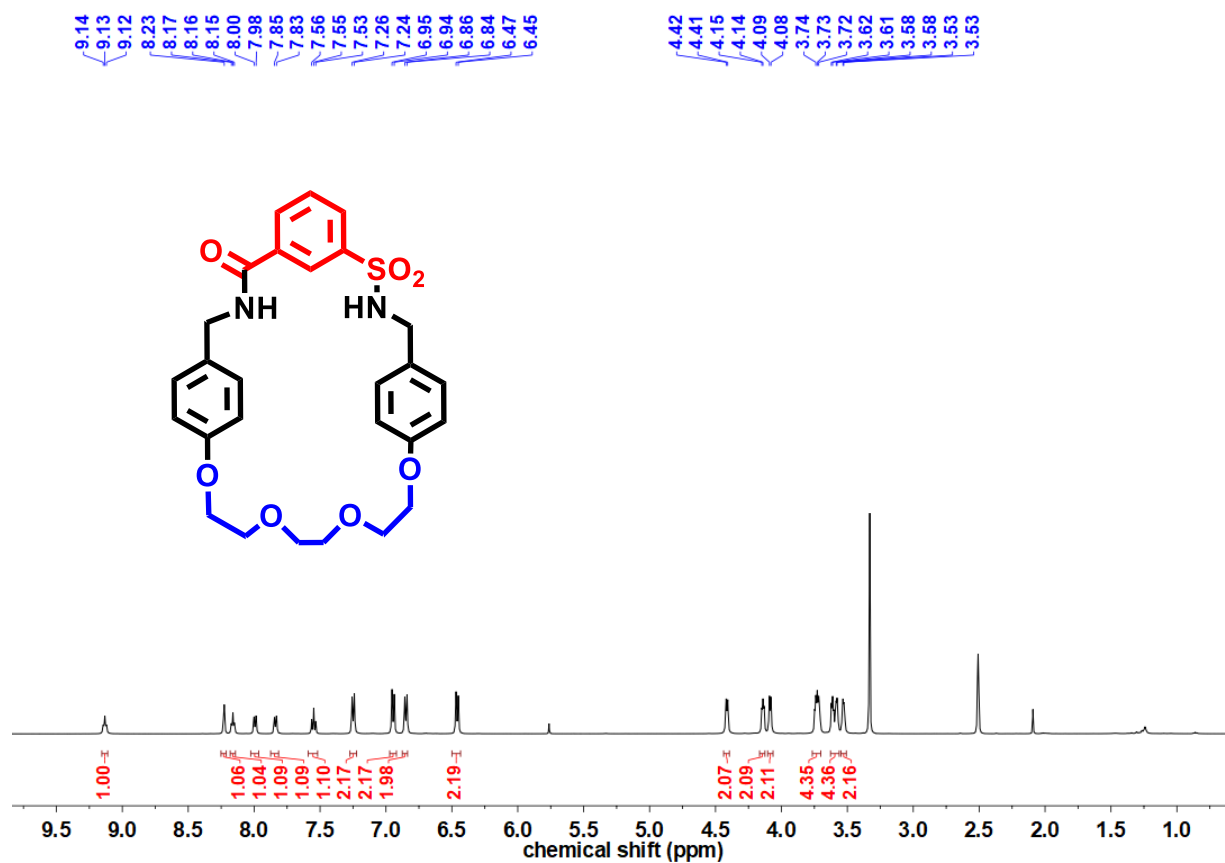

Figure S1. <sup>1</sup>H NMR spectrum (DMSO-*d*<sub>6</sub>, 298 K, 500 MHz) of **1**.

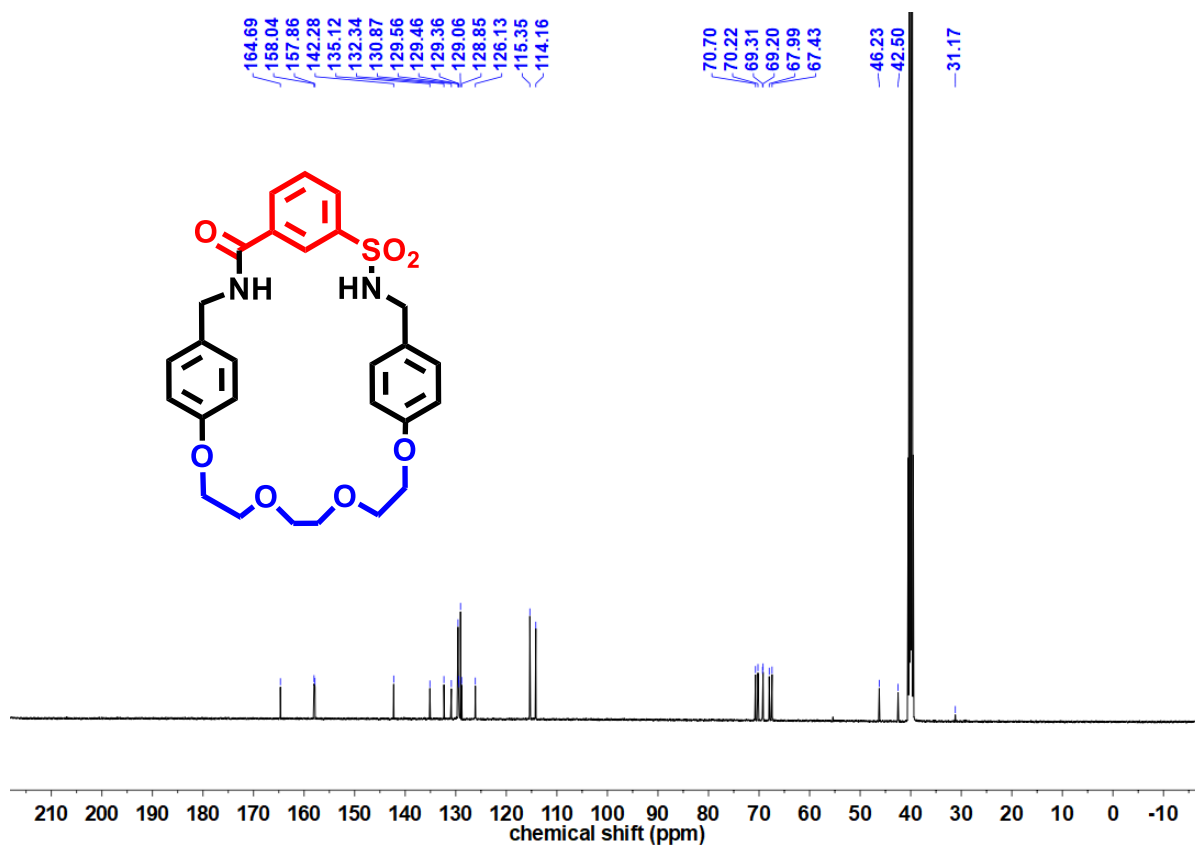

Figure S2. <sup>13</sup>C NMR spectrum (DMSO-*d*<sub>6</sub>, 298 K, 126 MHz) of **1**.



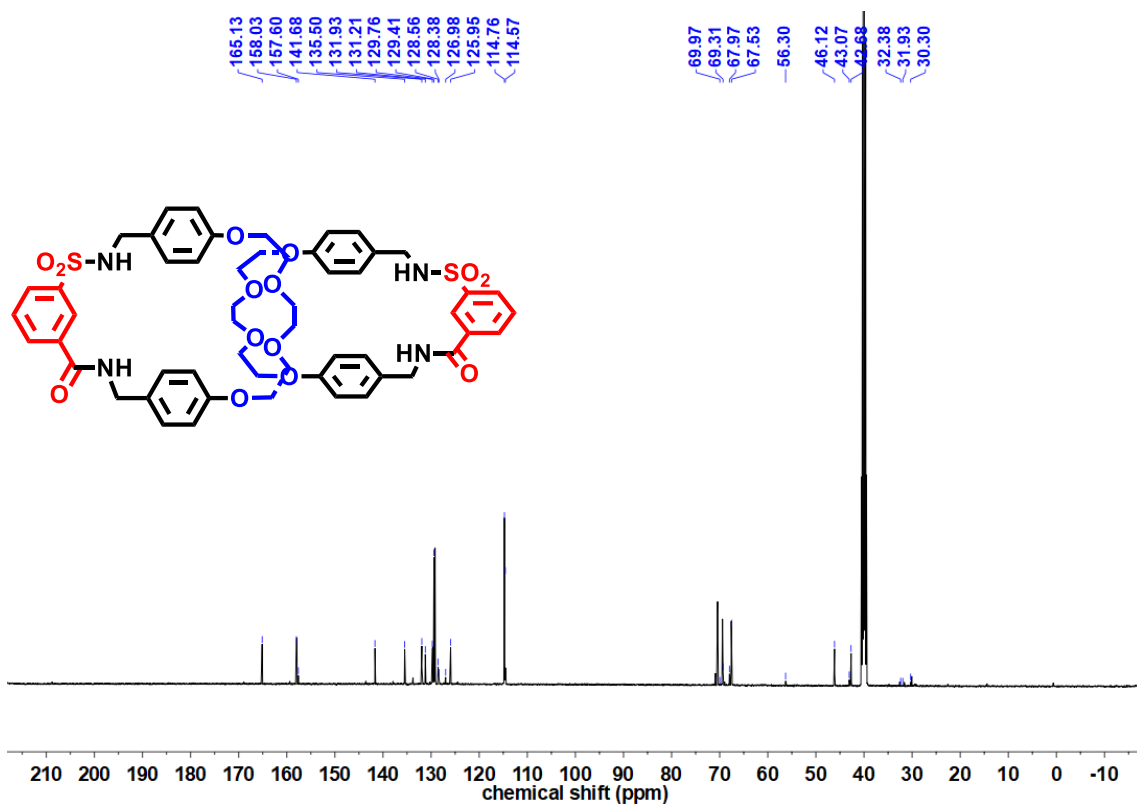

**Figure S5.**  $^{13}\text{C}$  NMR spectrum (DMSO- $d_6$ , 298 K, 126 MHz) of **3**.

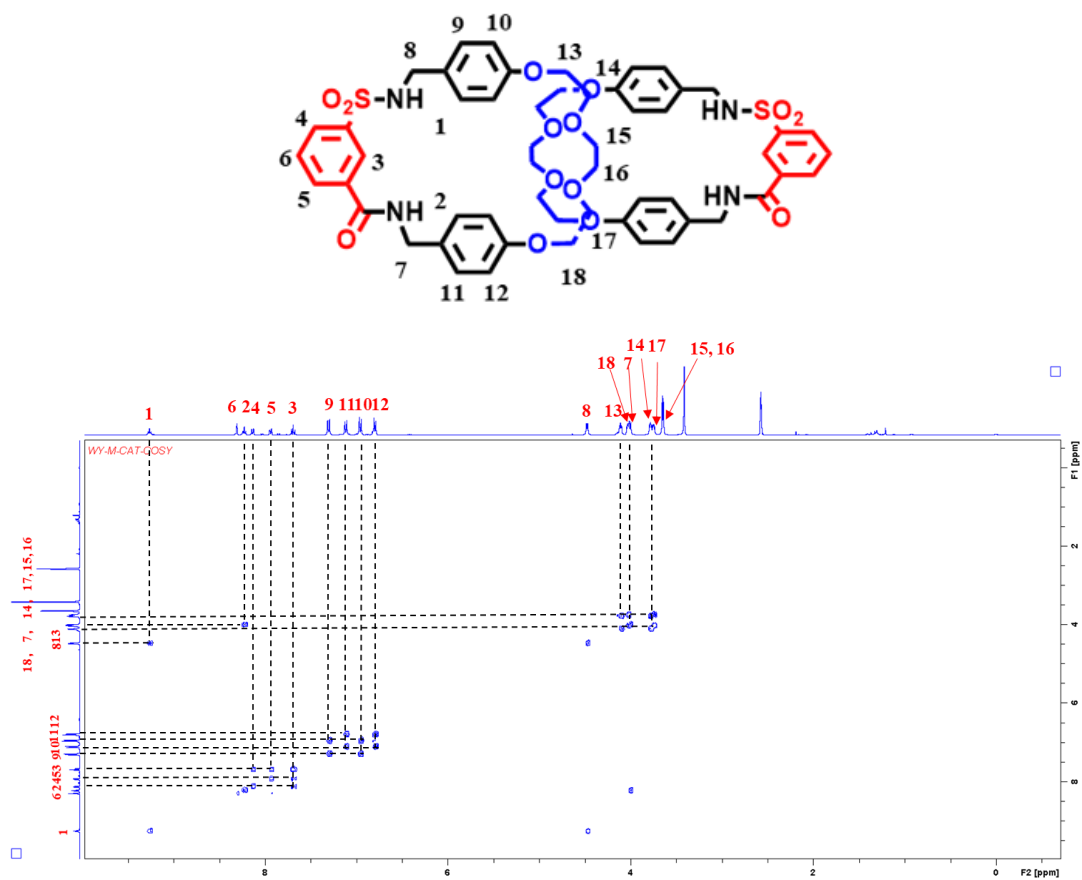

**Figure S6.** 2D  $^1\text{H}$ - $^1\text{H}$  COSY spectrum (DMSO- $d_6$ , 298 K, 500 MHz) of **3**.



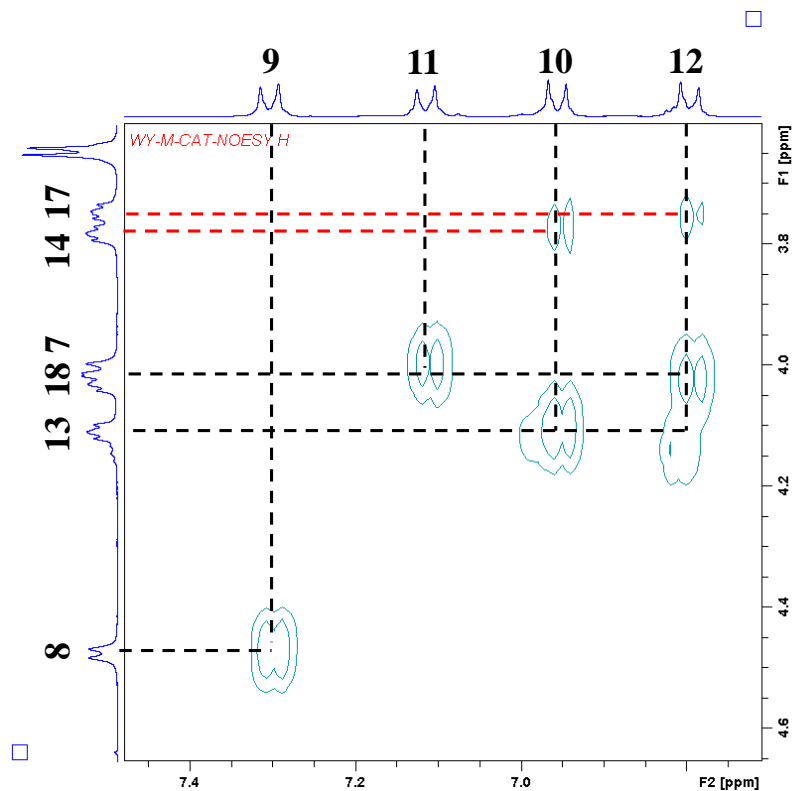

Figure S7. Partial 2D  $^1\text{H}$ - $^1\text{H}$  NOESY spectrum (DMSO- $d_6$ , 298 K, 500 MHz) of **3**.

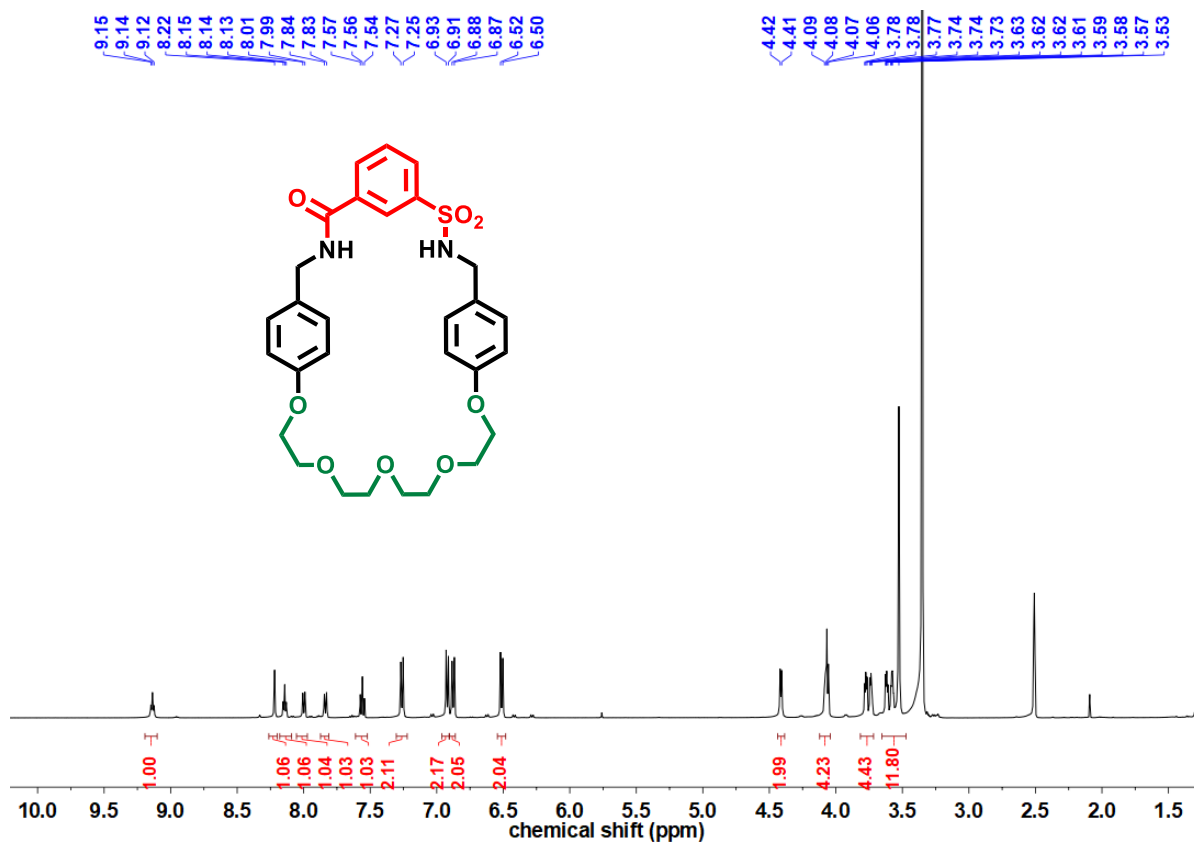

Figure S8.  $^1\text{H}$  NMR spectrum (DMSO- $d_6$ , 298 K, 500 MHz) of **4**.

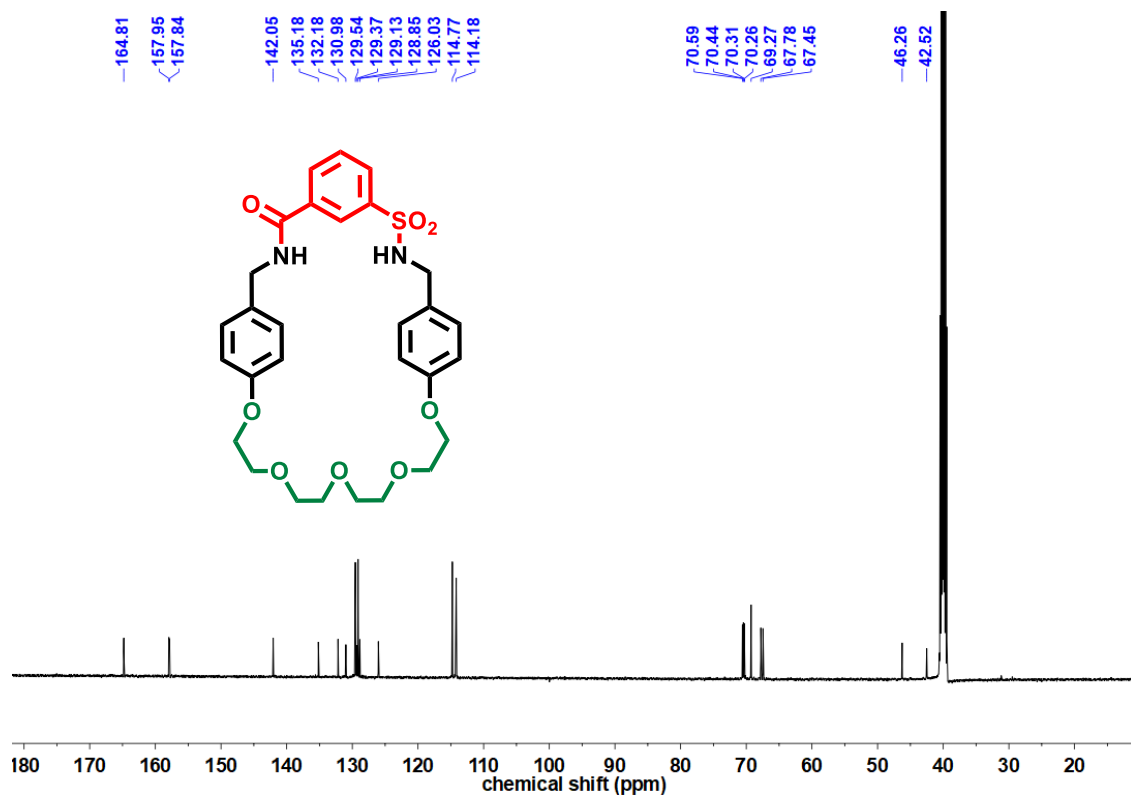

Figure S9.  $^{13}\text{C}$  NMR spectrum (DMSO- $d_6$ , 298 K, 126 MHz) of **4**.

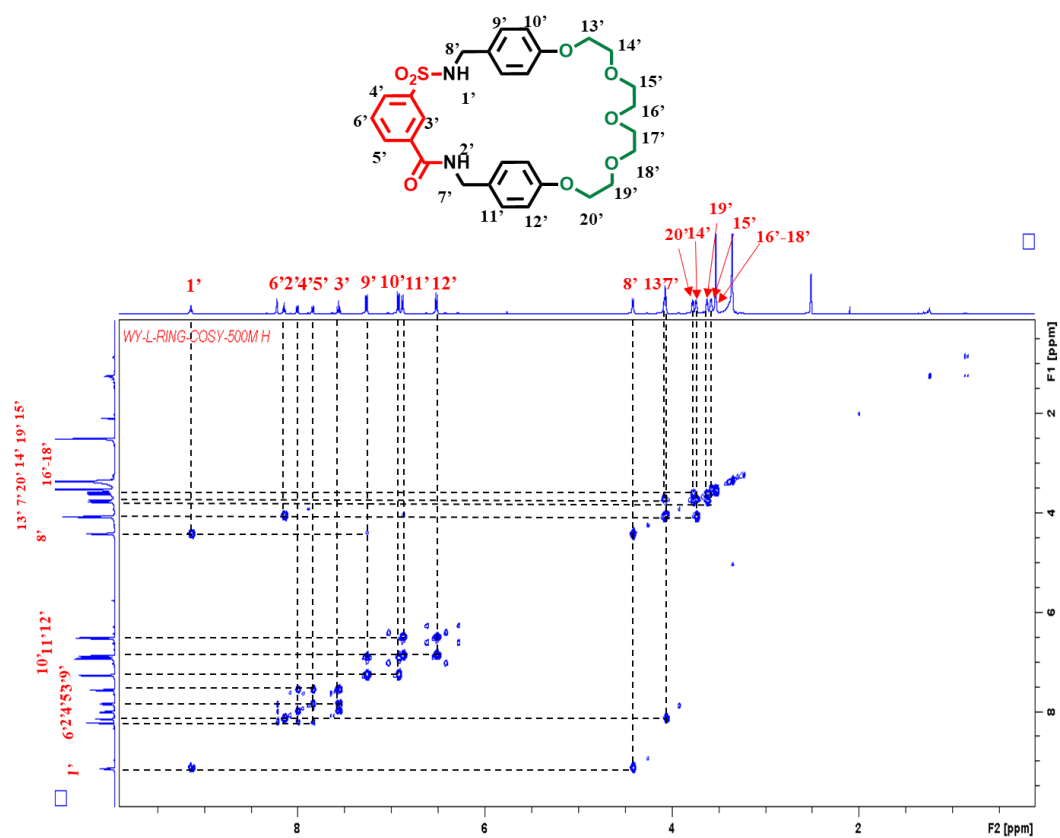

Figure S10. 2D  $^1\text{H}$ - $^1\text{H}$  COSY spectrum (DMSO- $d_6$ , 298 K, 500 MHz) of **4**.

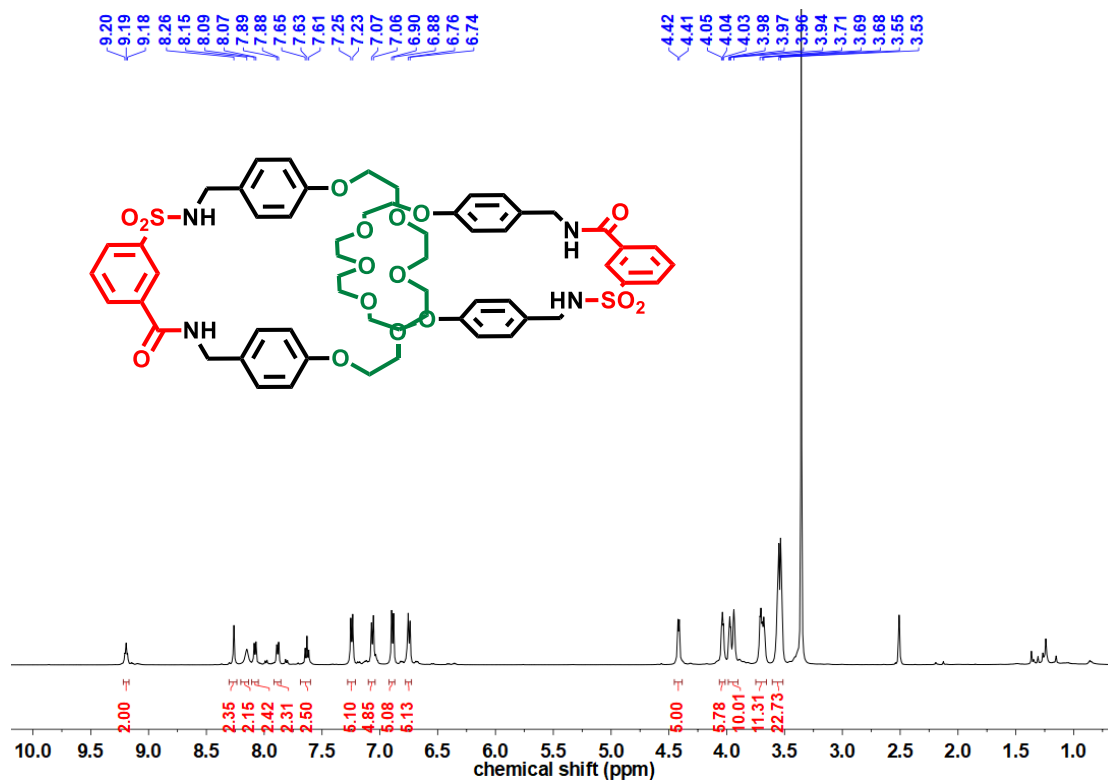

Figure S11. <sup>1</sup>H NMR spectrum (DMSO-*d*<sub>6</sub>, 298 K, 500 MHz) of 6.

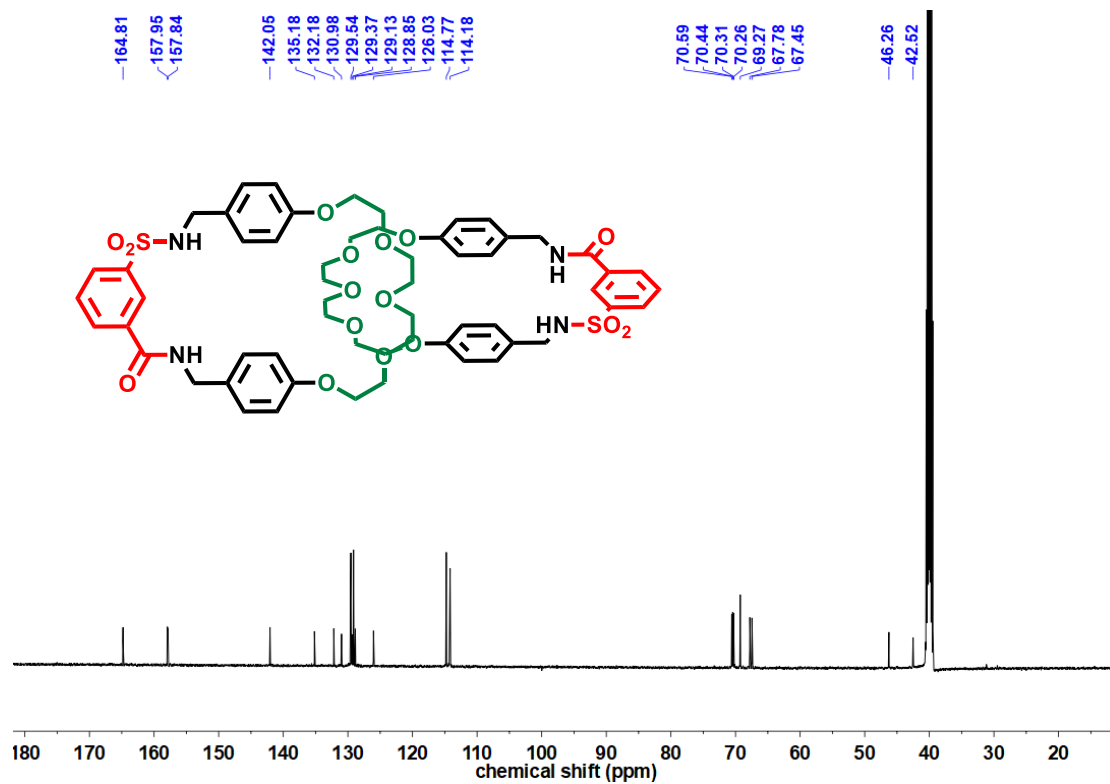

Figure S12. <sup>13</sup>C NMR spectrum (DMSO-*d*<sub>6</sub>, 298 K, 126 MHz) of 6.

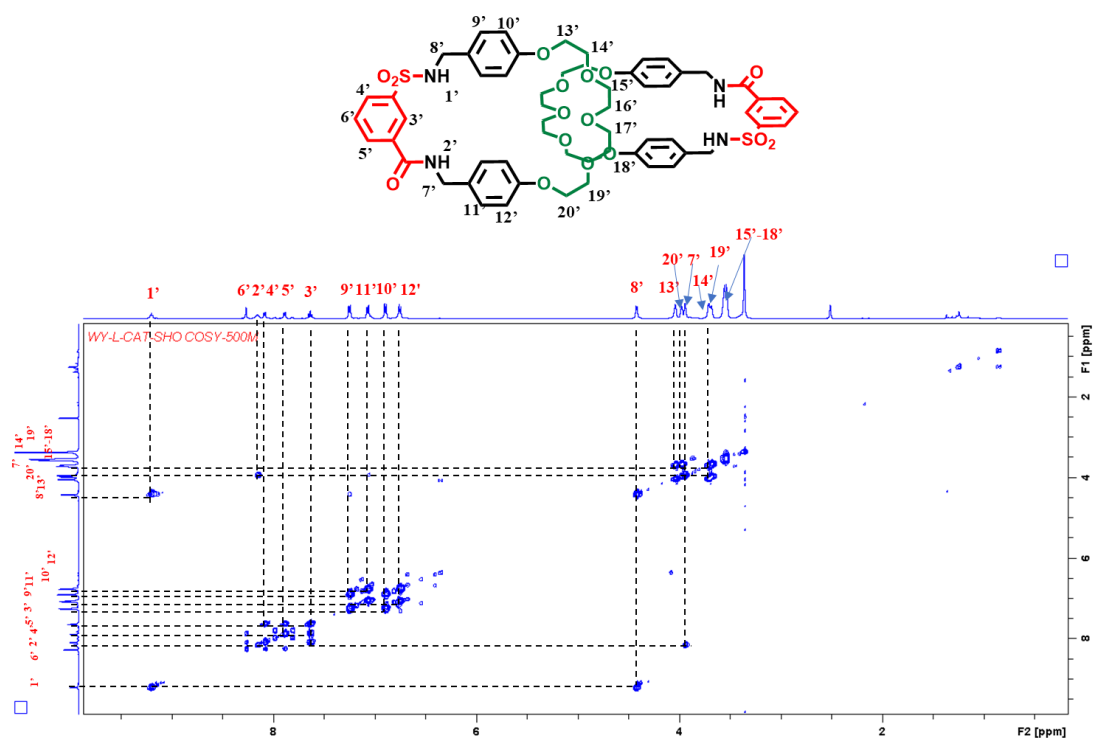

**Figure S13.** 2D  $^1\text{H}$ - $^1\text{H}$  COSY spectrum (DMSO- $d_6$ , 298 K, 500 MHz) of **6**.

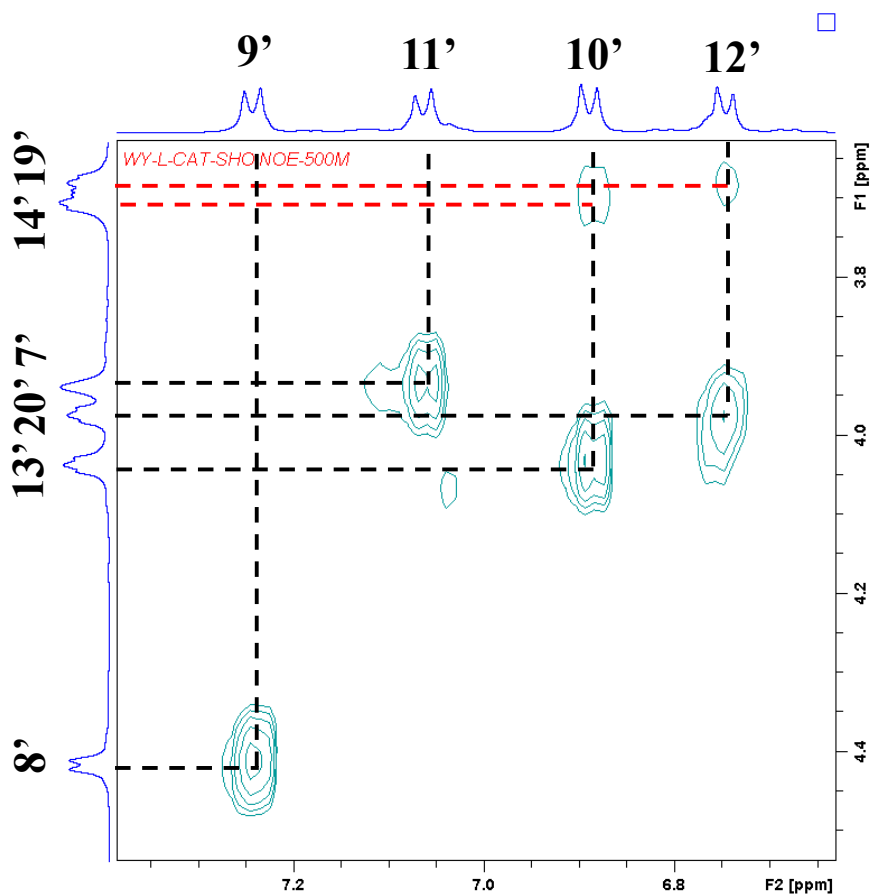

**Figure S14.** Partial 2D  $^1\text{H}$ - $^1\text{H}$  NOESY spectrum (DMSO- $d_6$ , 298 K, 500 MHz) of **6**.

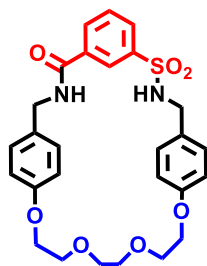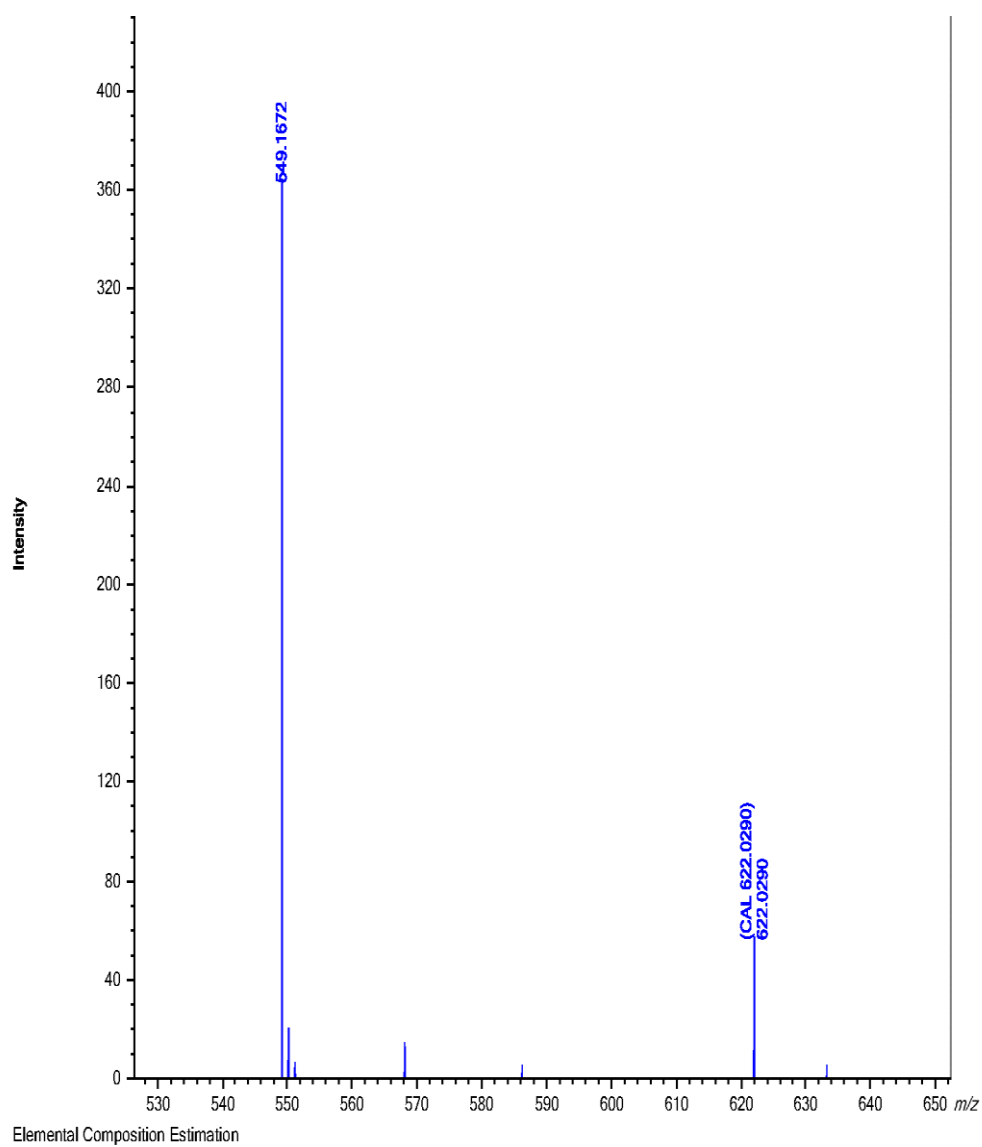

**Figure S15.** HRMS (ESI-TOF-MS) spectrum of **1**.

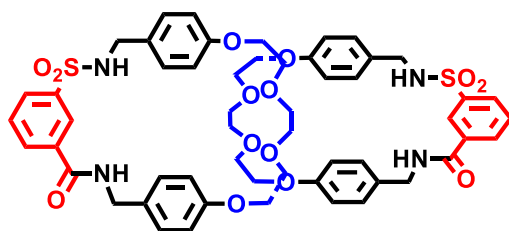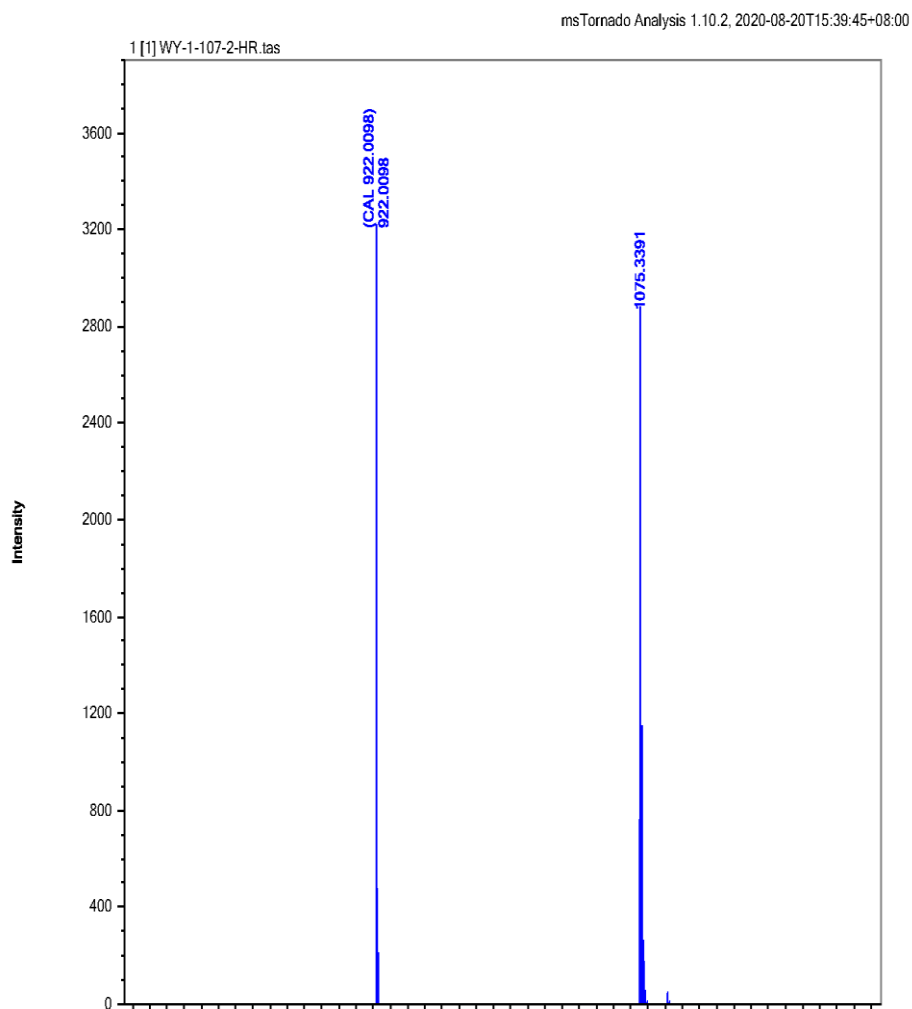

**Figure S16.** HRMS (ESI-TOF-MS) spectrum of **3**.

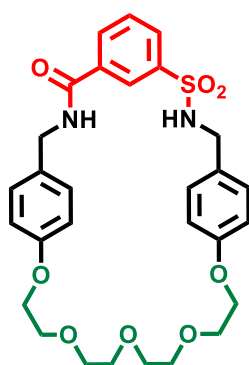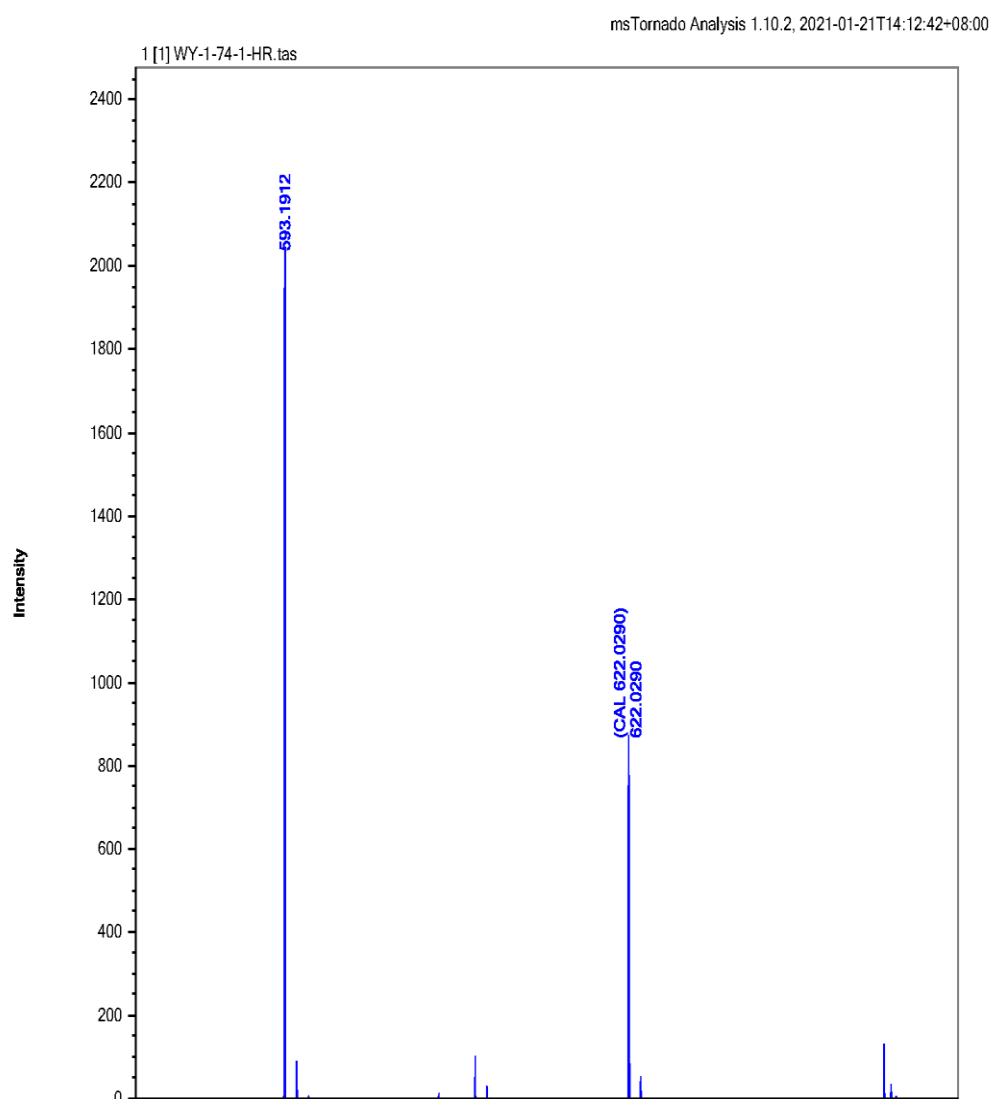

**Figure S17.** HRMS (ESI-TOF-MS) spectrum of **4**.

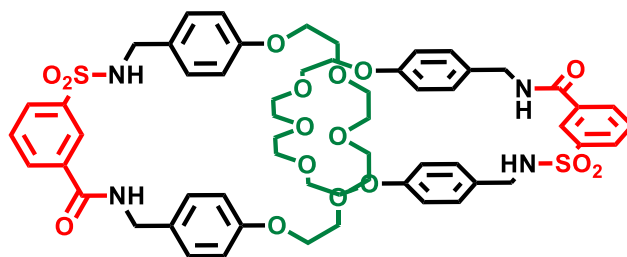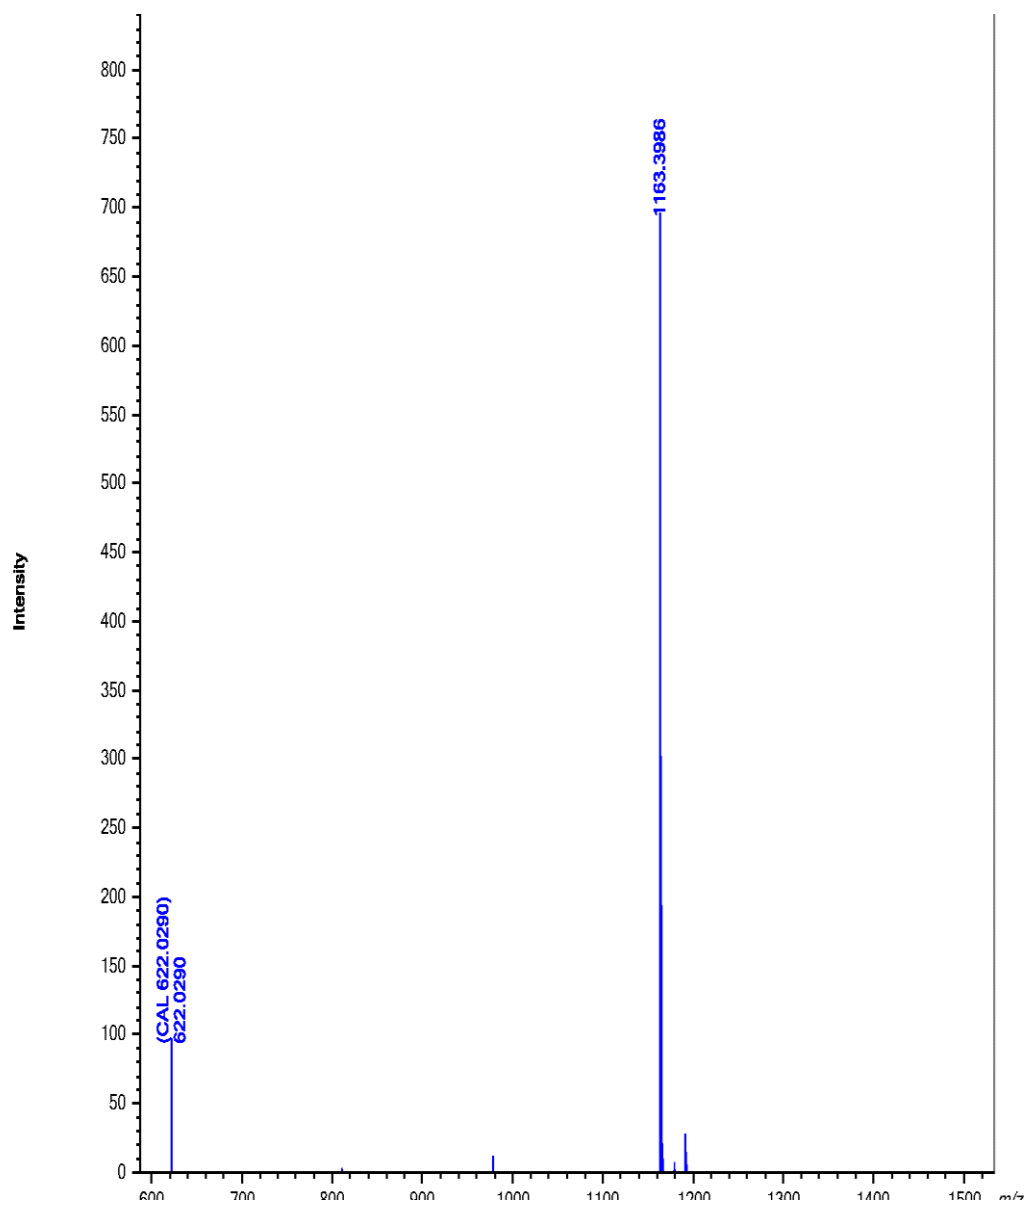

Figure S18. HRMS (ESI-TOF-MS) spectrum of **6**.



## Section C. CID/IMS measurements of [2]catenanes **3** and **6**.

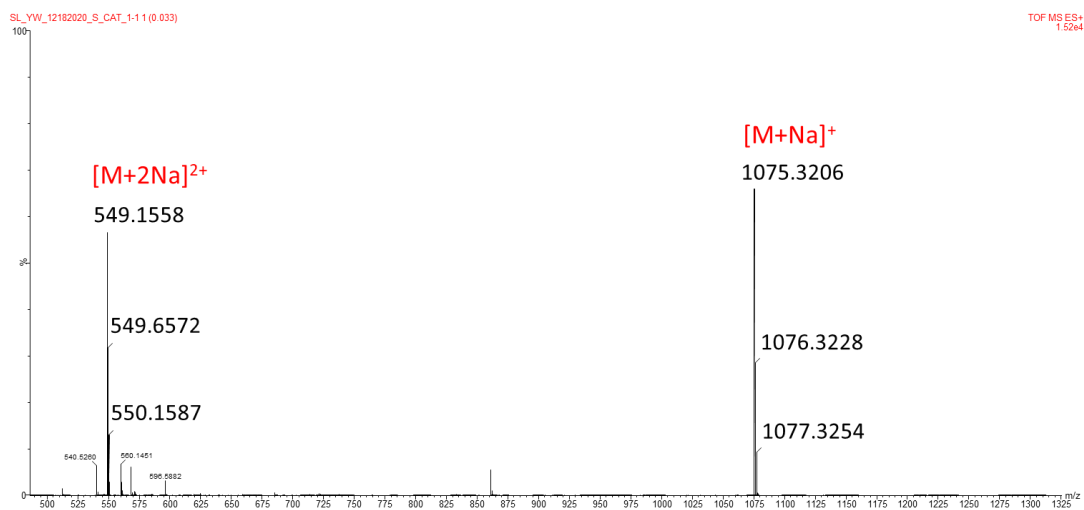

**Figure S19.** ESI-TOF-MS spectrum of **3**.

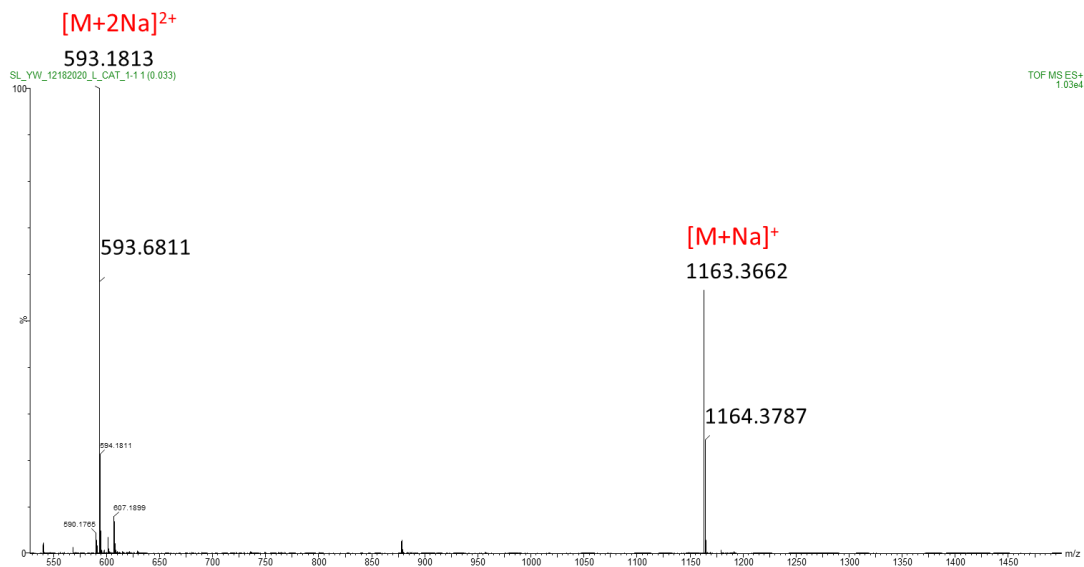

**Figure S20.** ESI-TOF-MS spectrum of **6**.

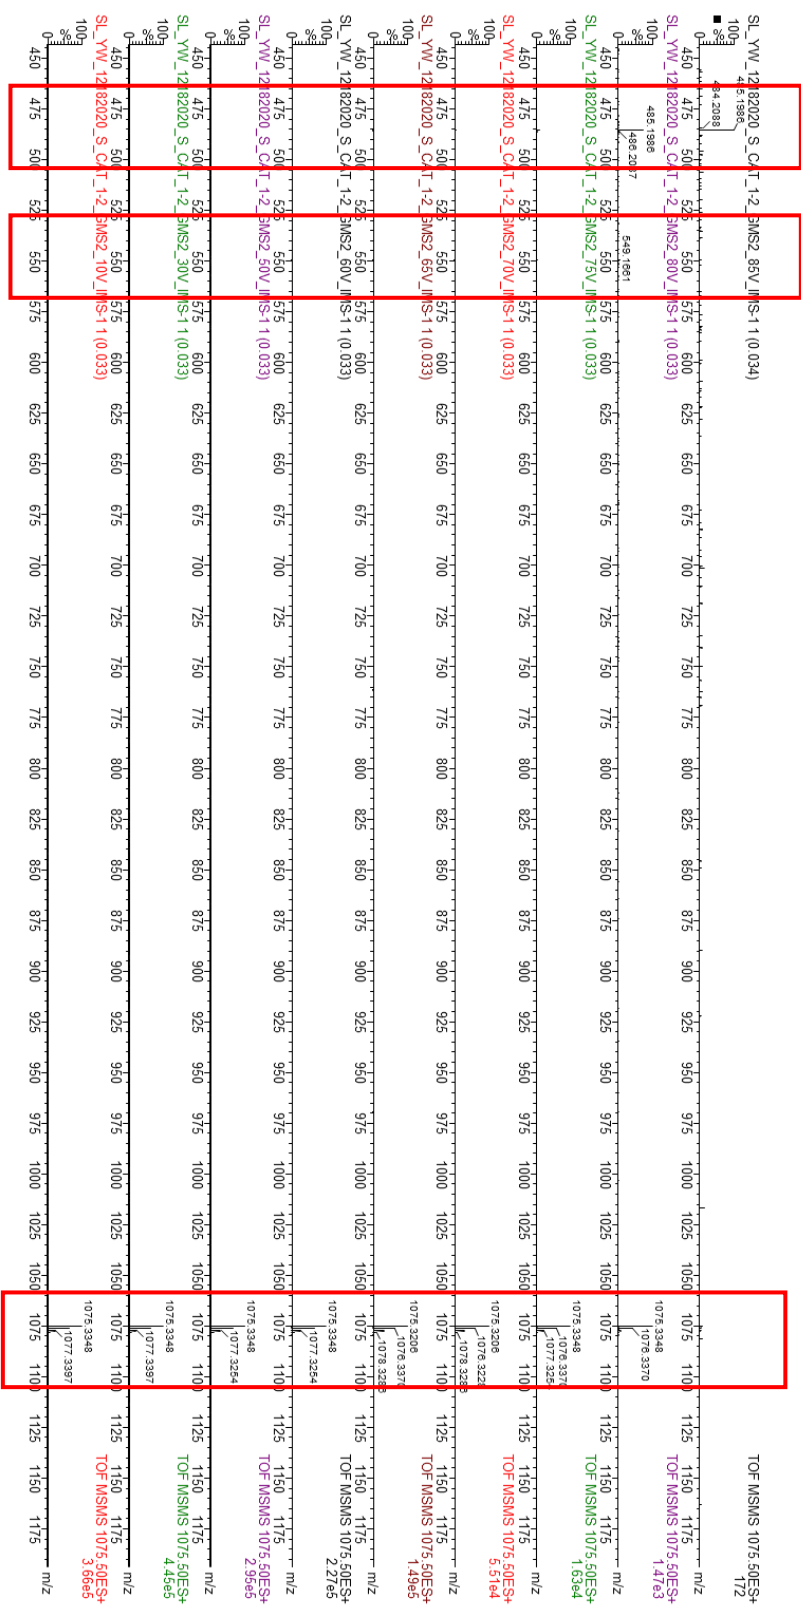

**Figure S21.** Full gMS<sup>2</sup> mass spectrum of **3** at 10 - 85V collision voltage in the mass selected CID/IMS experiments.

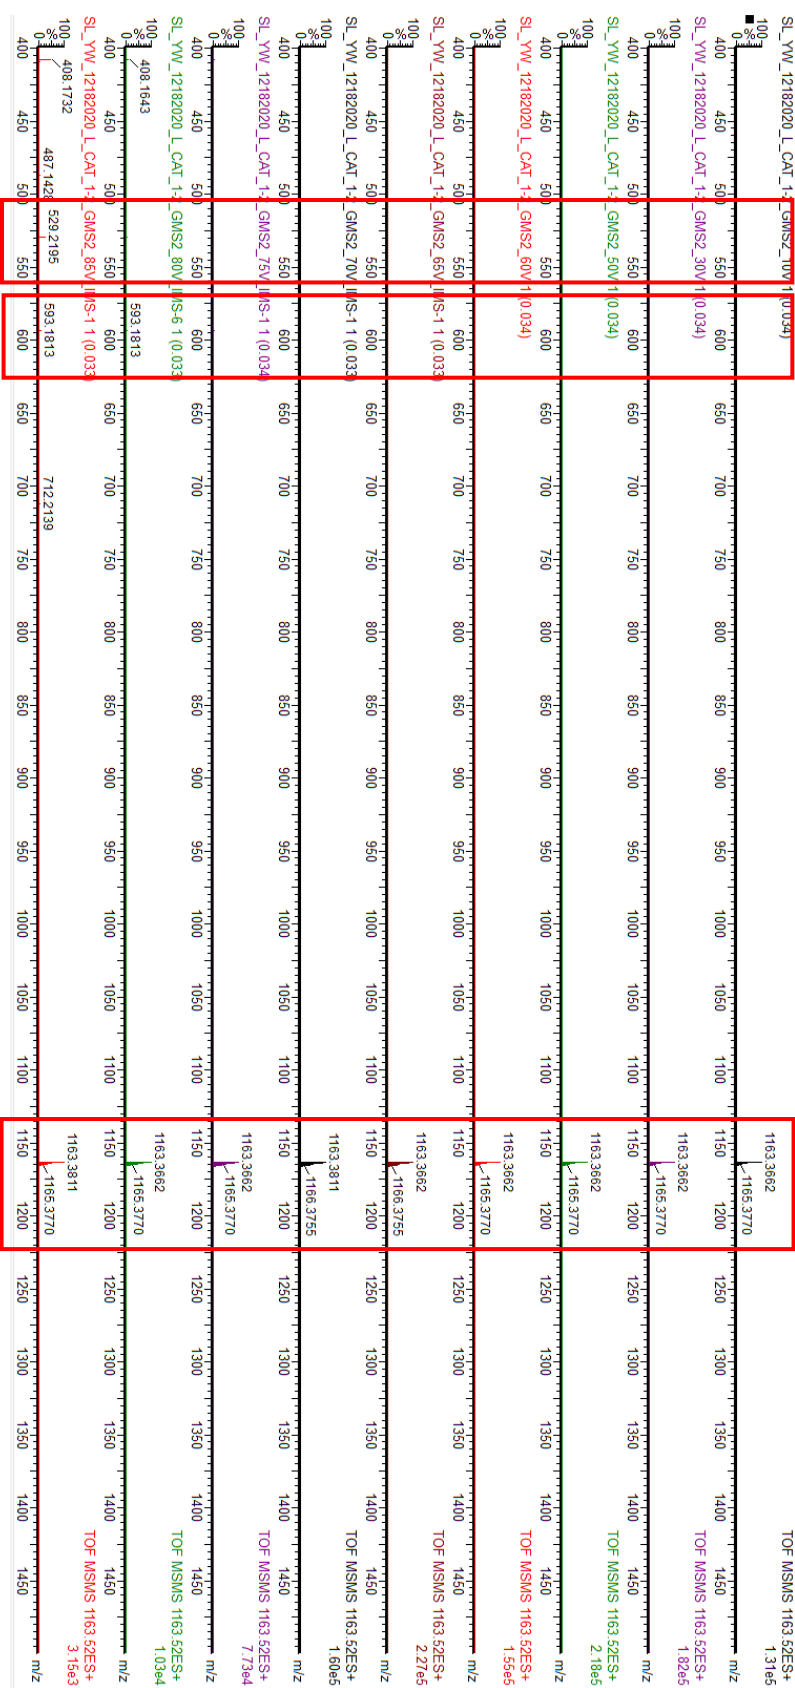

**Figure S22.** Full  $gMS^2$  mass spectrum of **6** at 10 - 85V collision voltage in the mass selected CID/IMS experiments.

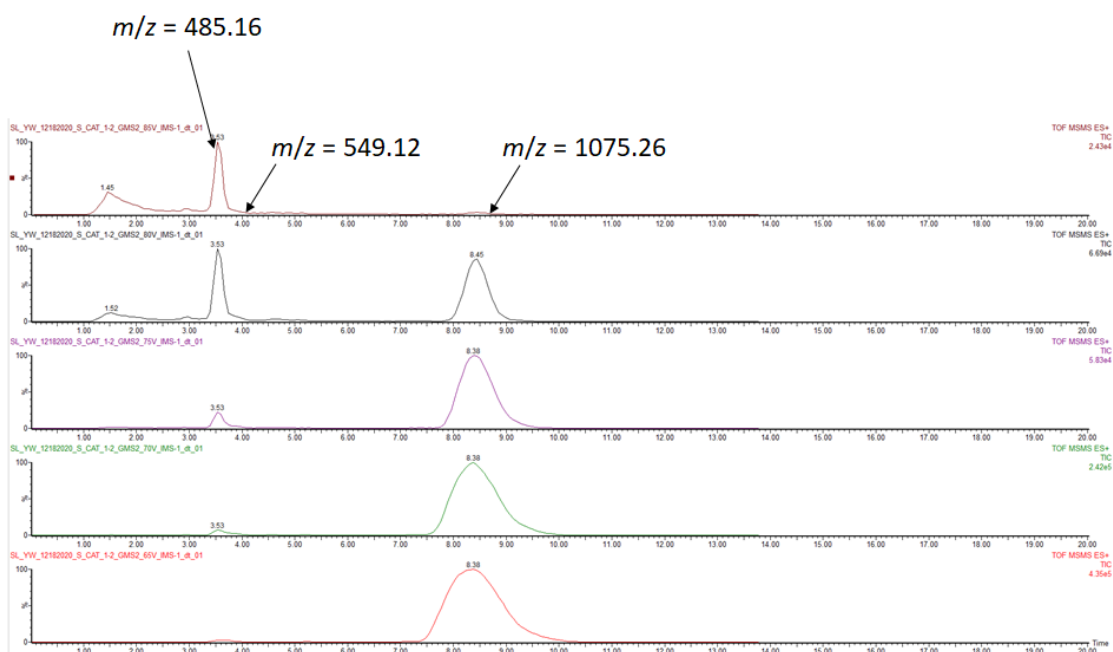

**Figure S23.** Normalized arrival time distributions of the species formed from [2]catenane **3** at 65 - 85 V collision voltage.

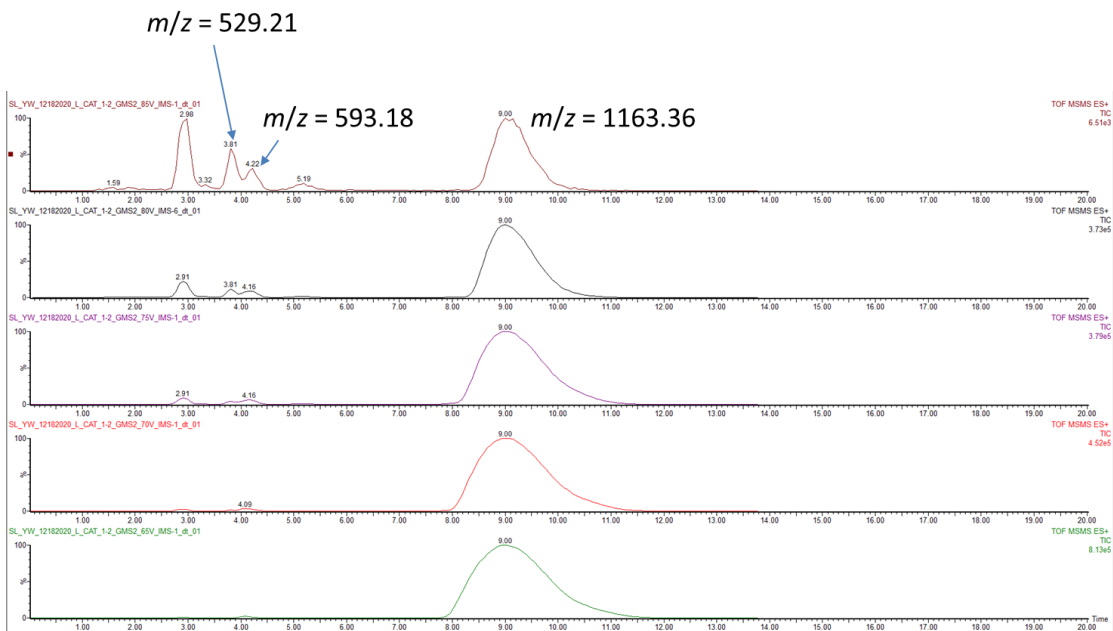

**Figure S24.** Normalized arrival time distributions of the species formed from [2]catenane **6** at 65 - 85 V collision voltage.

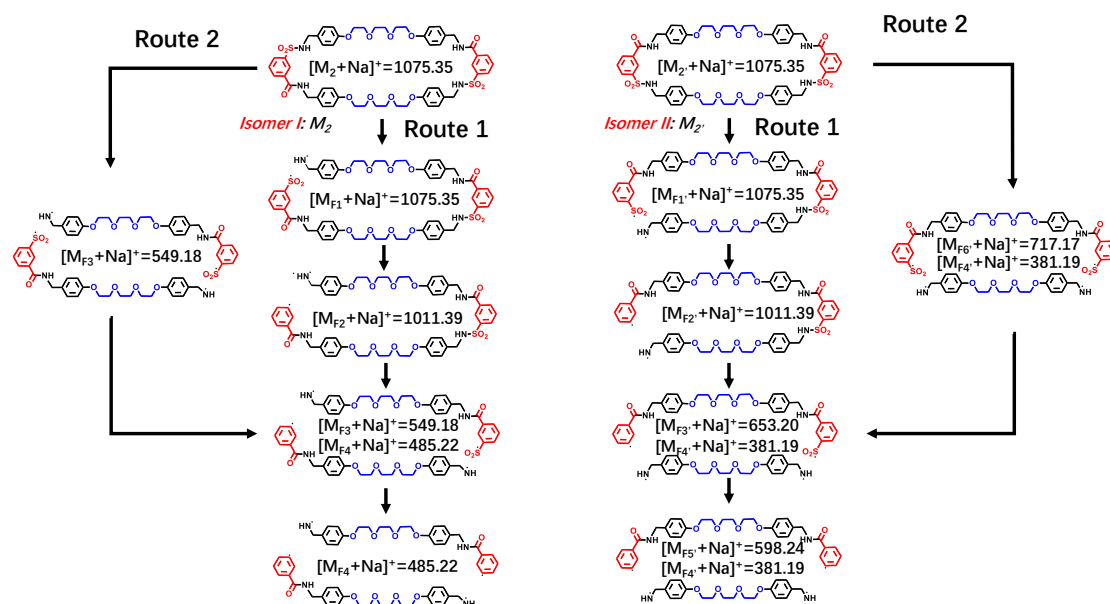

**Fig. S25.** Possible fragmentation pathways of the two isomers of macrocycle **2** and the expected  $m/z$  values of the corresponding sodiated *pseudo*-molecular ions.

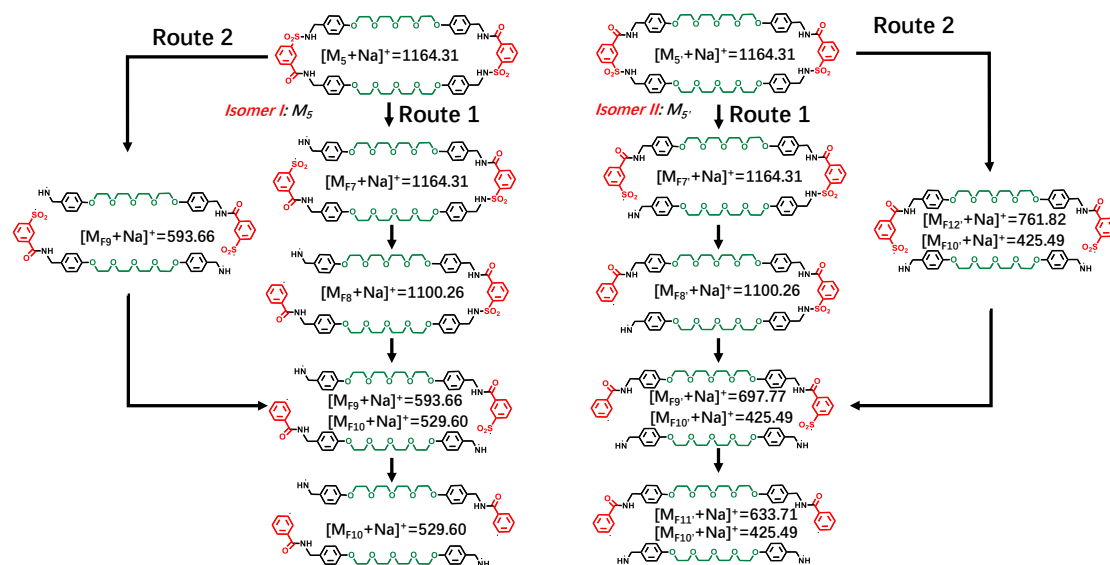

**Fig. S26.** Possible fragmentation pathways of the two isomers of macrocycle **5** and the expected  $m/z$  values of the corresponding sodiated *pseudo*-molecular ions.

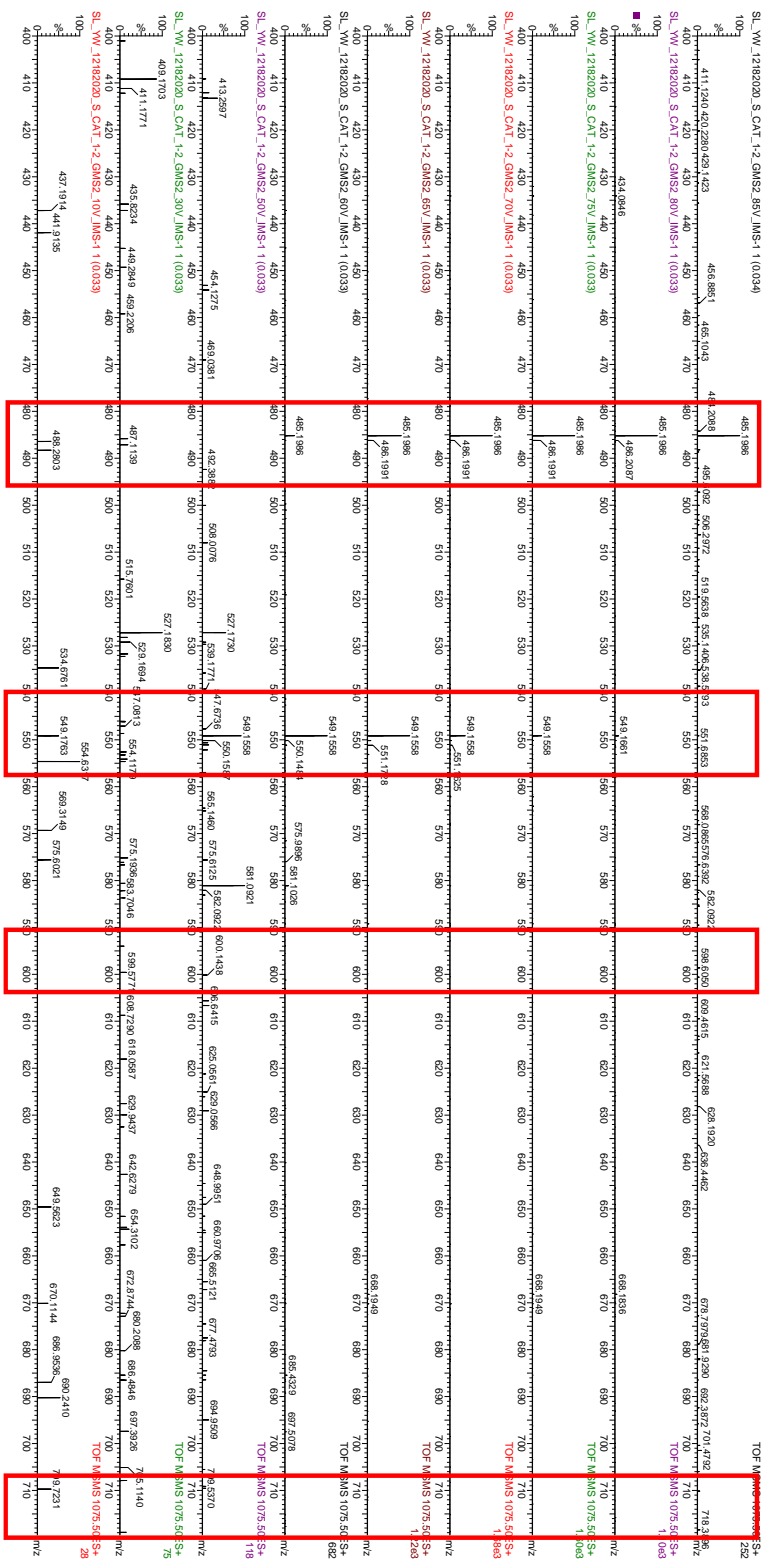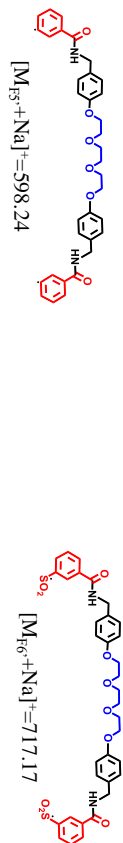

**Figure S27.** Partial  $GMS^2$  mass spectrum of **3** at 10 - 85V collision voltage in the mass selected CID/IMS experiments in which the characteristic peaks of macrocycle **2** were not observed.

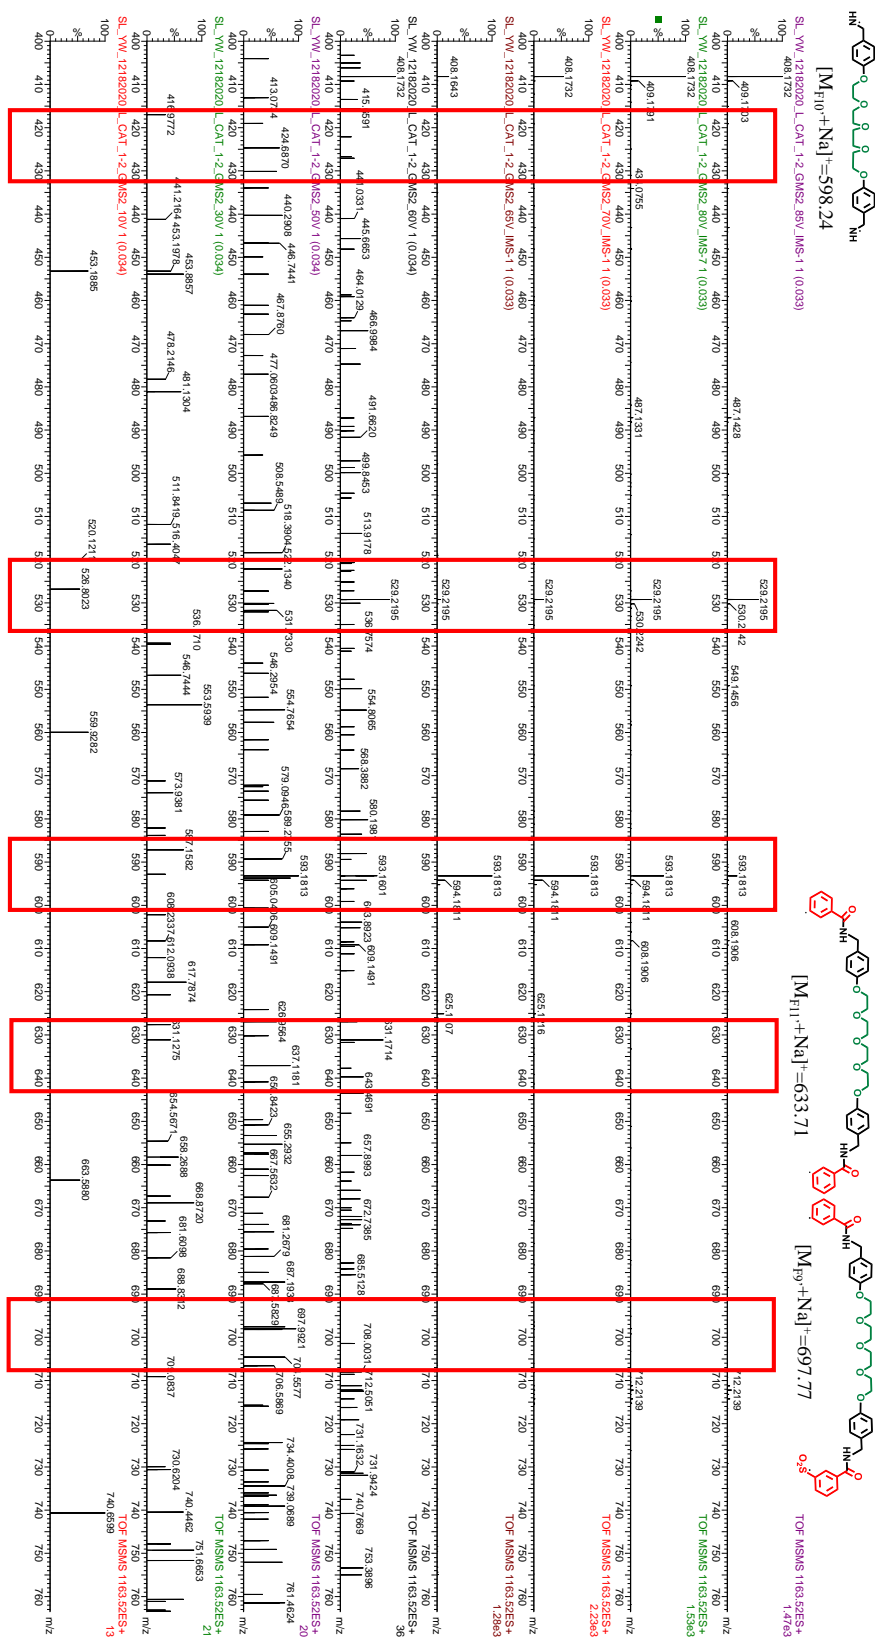

**Figure S28.** Partial gMS<sup>2</sup> mass spectrum of **6** at 10 - 85V collision voltage in the mass selected CID/IMS experiments in which the characteristic peaks of macrocycle **5** were not observed.

## Section D. Synthesis and photophysical properties of pyrene-functionalized [2]catenane **7** and macrocycle **8**.

**Scheme S2.** The synthesis route of pyrene-functionalized [2]catenane **7** and macrocycle **8**.

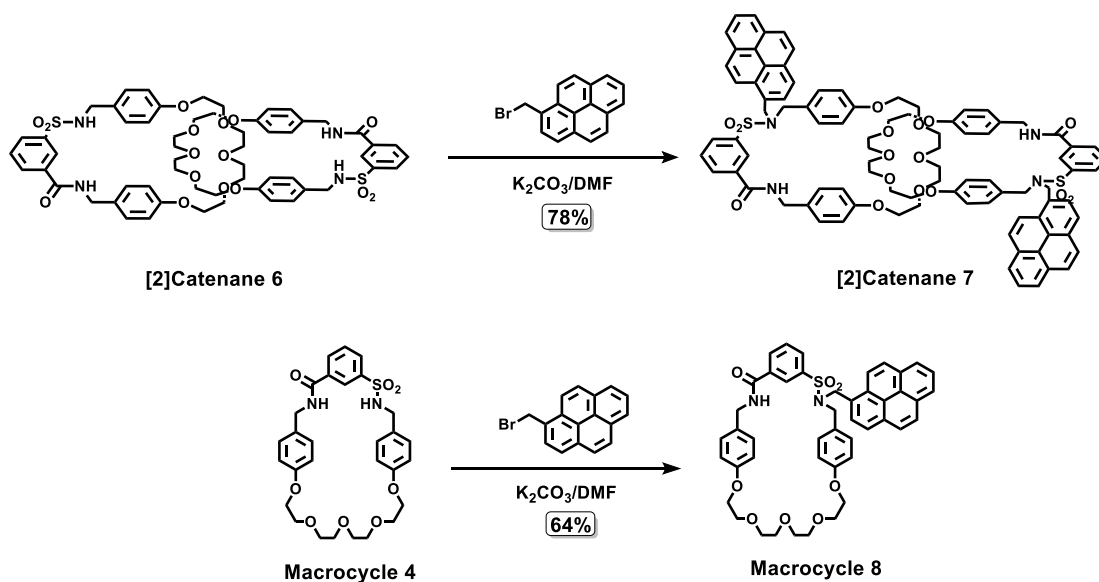

**Synthesis of the [2]catenane **7**:**  $K_2CO_3$  (15 mg, 0.108 mmol, 2.5 eq.) was added to a solution of [2]catenane **6** (50 mg, 0.043 mmol, 1 eq.) in DMF (20 mL) and then the suspension was stirred at room temperature for 30 min. 1-(Bromomethyl)pyrene (127 mg, 0.430 mmol, 10 eq.) was added and then the mixture was heated at 50°C for 48 h. After cooling to room temperature, then evaporating the organic solvent under reduced pressure, the residue was partitioned between  $H_2O$  (20 mL) and  $CH_2Cl_2$  ( $3 \times 20$  mL); the combined organic phases were dried ( $MgSO_4$ ) and concentrated. The residue was purified chromatographically ( $SiO_2$ ; EtOAc/DCM = 1:4) to afford **7** as a white solid (52 mg, 78%).  $^1H$  NMR (500 MHz,  $CD_2Cl_2$ )  $\delta$  7.86-8.15 (m, 22H), 7.69-7.71 (d,  $J = 10.0$  Hz, 2H), 7.43-7.47 (t,  $J = 10.0$  Hz, 2H), 7.11-7.12 (d,  $J = 10.0$  Hz, 4H), 7.02-7.05 (t,  $J = 7.5$  Hz, 2H), 6.72-6.74 (d,  $J = 10.0$  Hz, 4H), 6.65-6.66 (d,  $J = 5.0$  Hz, 4H), 6.25-6.26 (d,  $J = 5.0$  Hz, 4H), 4.98 (s, 4H), 4.38-4.39 (d,  $J = 5.0$  Hz, 4H), 4.20 (s, 4H), 3.92-3.93 (m, 4H), 3.70-3.71 (m, 4H), 3.54-3.59 (m, 20H).  $^{13}C$  NMR (126 MHz,  $CD_2Cl_2$ )  $\delta$  165.46, 158.19, 157.81, 140.03, 153.62, 131.46,



131.17, 131.09, 130.55, 130.45, 129.66, 129.43, 129.37, 129.09, 128.34, 127.73, 127.70, 127.68, 127.41, 127.20, 125.98, 125.41, 125.26, 124.54, 124.41, 124.30, 122.82, 114.55, 113.82, 70.65, 70.60, 69.52, 69.37, 67.49, 67.23, 51.01, 50.08, 43.37. HRMS (ESI-TOF): Calculated for [7 + Na]<sup>+</sup>: 1591.5529; Found: 1591.5511.

**Synthesis of the macrocycle 8:** K<sub>2</sub>CO<sub>3</sub> (15 mg, 0.110 mmol, 1.2 eq.) was added to a solution of macrocycle 4 (50 mg, 0.088 mmol, 1 eq.) in DMF (20 mL) and then the suspension was stirred at room temperature for 30 min. 1-(Bromomethyl)pyrene (127 mg, 0.430 mmol, 5 eq.) was added and then the mixture was heated at 50°C for 48 h. After cooling to room temperature, then evaporating the organic solvent under reduced pressure, the residue was partitioned between H<sub>2</sub>O (20 mL) and CH<sub>2</sub>Cl<sub>2</sub> (3 × 20 mL); the combined organic phases were dried (MgSO<sub>4</sub>) and concentrated. The residue was purified chromatographically (SiO<sub>2</sub>; EtOAc/DCM = 1:6) to afford 8 as a white solid (44 mg, 64%). <sup>1</sup>H NMR (500 MHz, CD<sub>2</sub>Cl<sub>2</sub>) δ 7.97-8.21 (m, 11H), 7.91-7.93 (d, *J* = 10.0 Hz, 1H), 7.49-7.52 (t, *J* = 10.0 Hz, 1H), 7.23-7.25 (d, *J* = 10.0 Hz, 2H), 6.89-6.90 (d, *J* = 5.0 Hz, 2H), 6.55-6.57 (d, *J* = 10.0 Hz, 2H), 6.43-6.45 (t, *J* = 5.0 Hz, 1H), 6.41-6.43 (d, *J* = 10.0 Hz, 2H), 5.12 (s, 2H), 4.48-4.49 (d, *J* = 5.0 Hz, 2H), 4.26 (s, 2H), 4.08-4.10 (m, 2H), 3.76-3.80 (m, 4H), 3.63-3.68 (m, 4H), 3.57-3.60 (m, 6H). <sup>13</sup>C NMR (126 MHz, CD<sub>2</sub>Cl<sub>2</sub>) δ 165.01, 158.43, 158.23, 140.65, 135.50, 131.35, 131.30, 131.21, 130.68, 130.60, 129.85, 129.61, 129.45, 129.39, 129.12, 128.41, 127.85, 127.70, 127.57, 127.35, 127.30, 126.11, 125.41, 125.36, 125.07, 124.77, 124.71, 124.47, 122.66, 114.88, 114.12, 70.76, 70.71, 70.59, 70.54, 69.52, 69.44, 67.77, 67.39, 49.89, 49.14, 43.34. HRMS (ESI-TOF): Calculated for [8 + Na]<sup>+</sup>: 807.2711; Found: 807.2731.

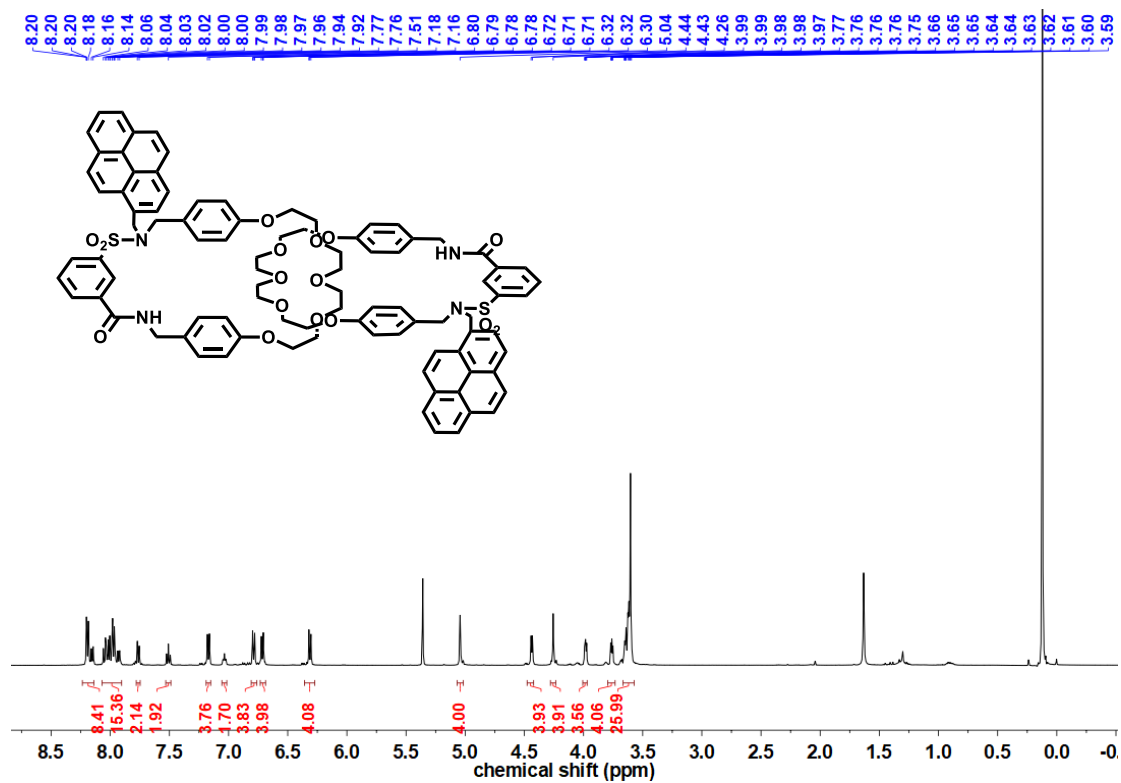

Figure S29.  $^1\text{H}$  NMR spectrum ( $\text{CD}_2\text{Cl}_2$ , 298 K, 500 MHz) of 7.

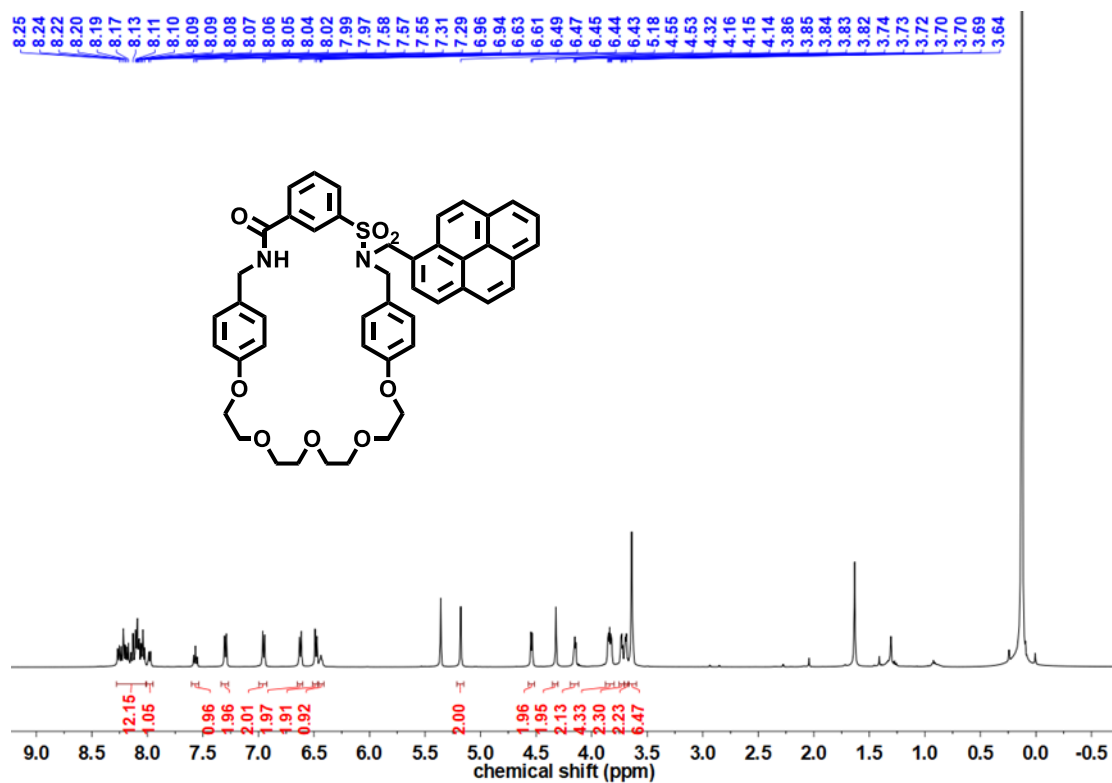

Figure S30.  $^1\text{H}$  NMR spectrum ( $\text{CD}_2\text{Cl}_2$ , 298 K, 500 MHz) of 8.

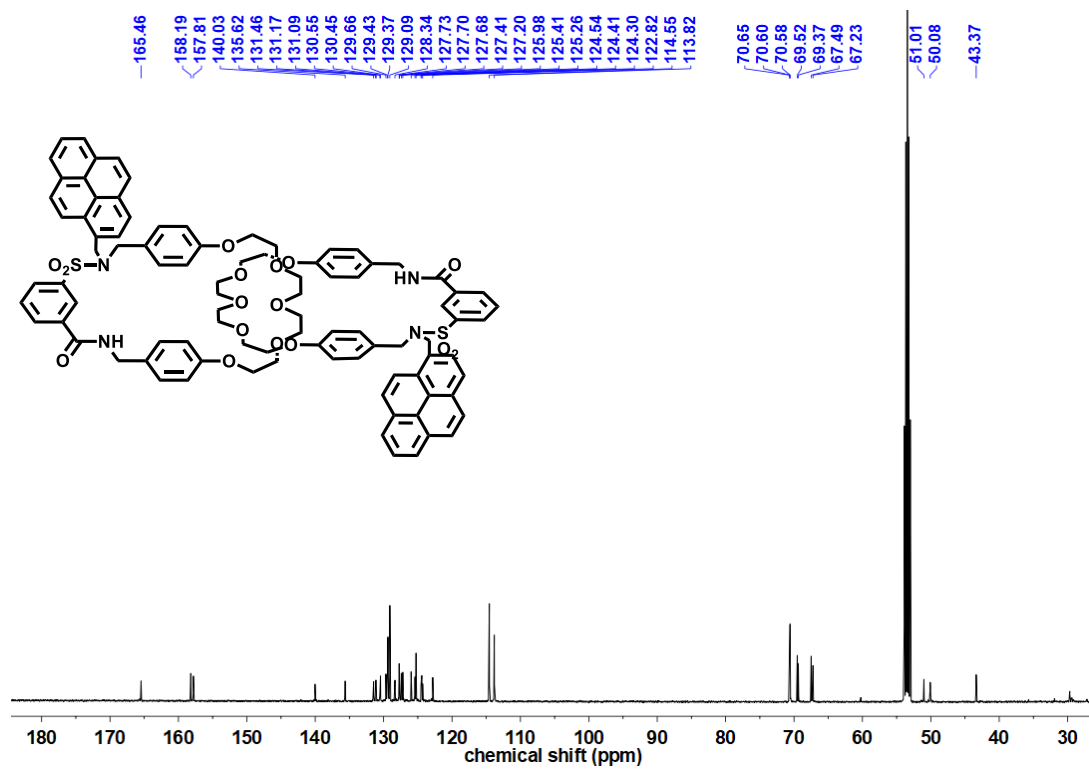

Figure S31.  $^{13}\text{C}$  NMR spectrum ( $\text{CD}_2\text{Cl}_2$ , 298 K, 126 MHz) of **7**.

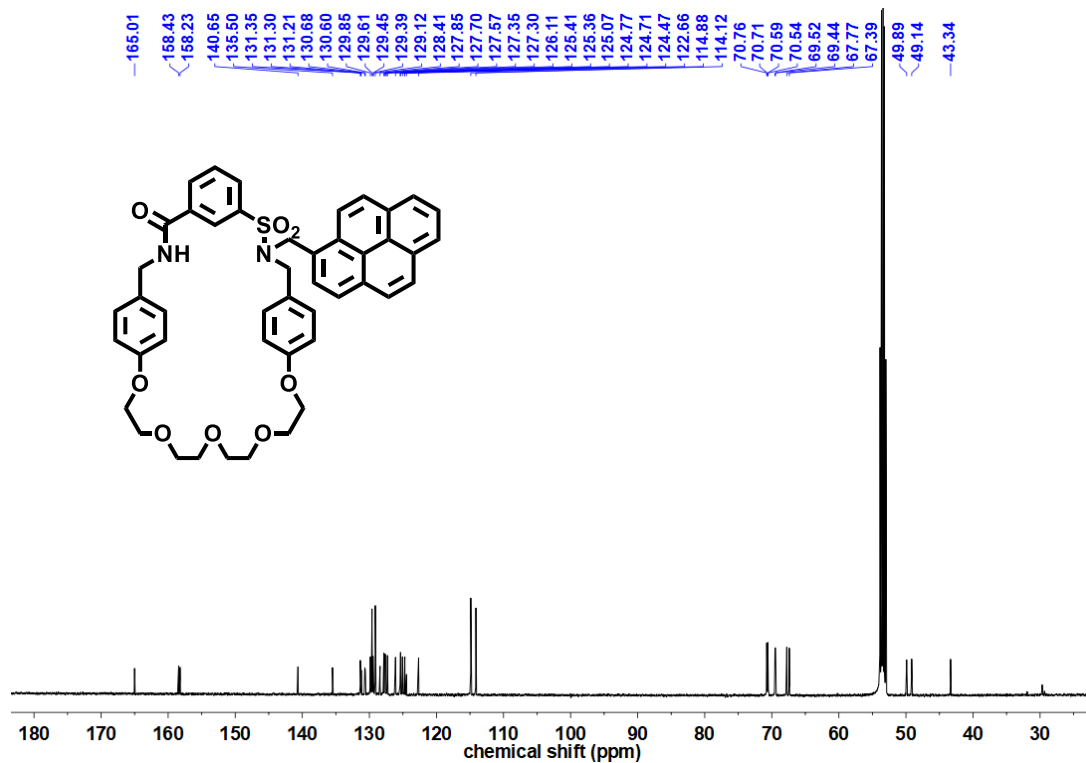

Figure S32.  $^{13}\text{C}$  NMR spectrum ( $\text{CD}_2\text{Cl}_2$ , 298 K, 126 MHz) of **8**.

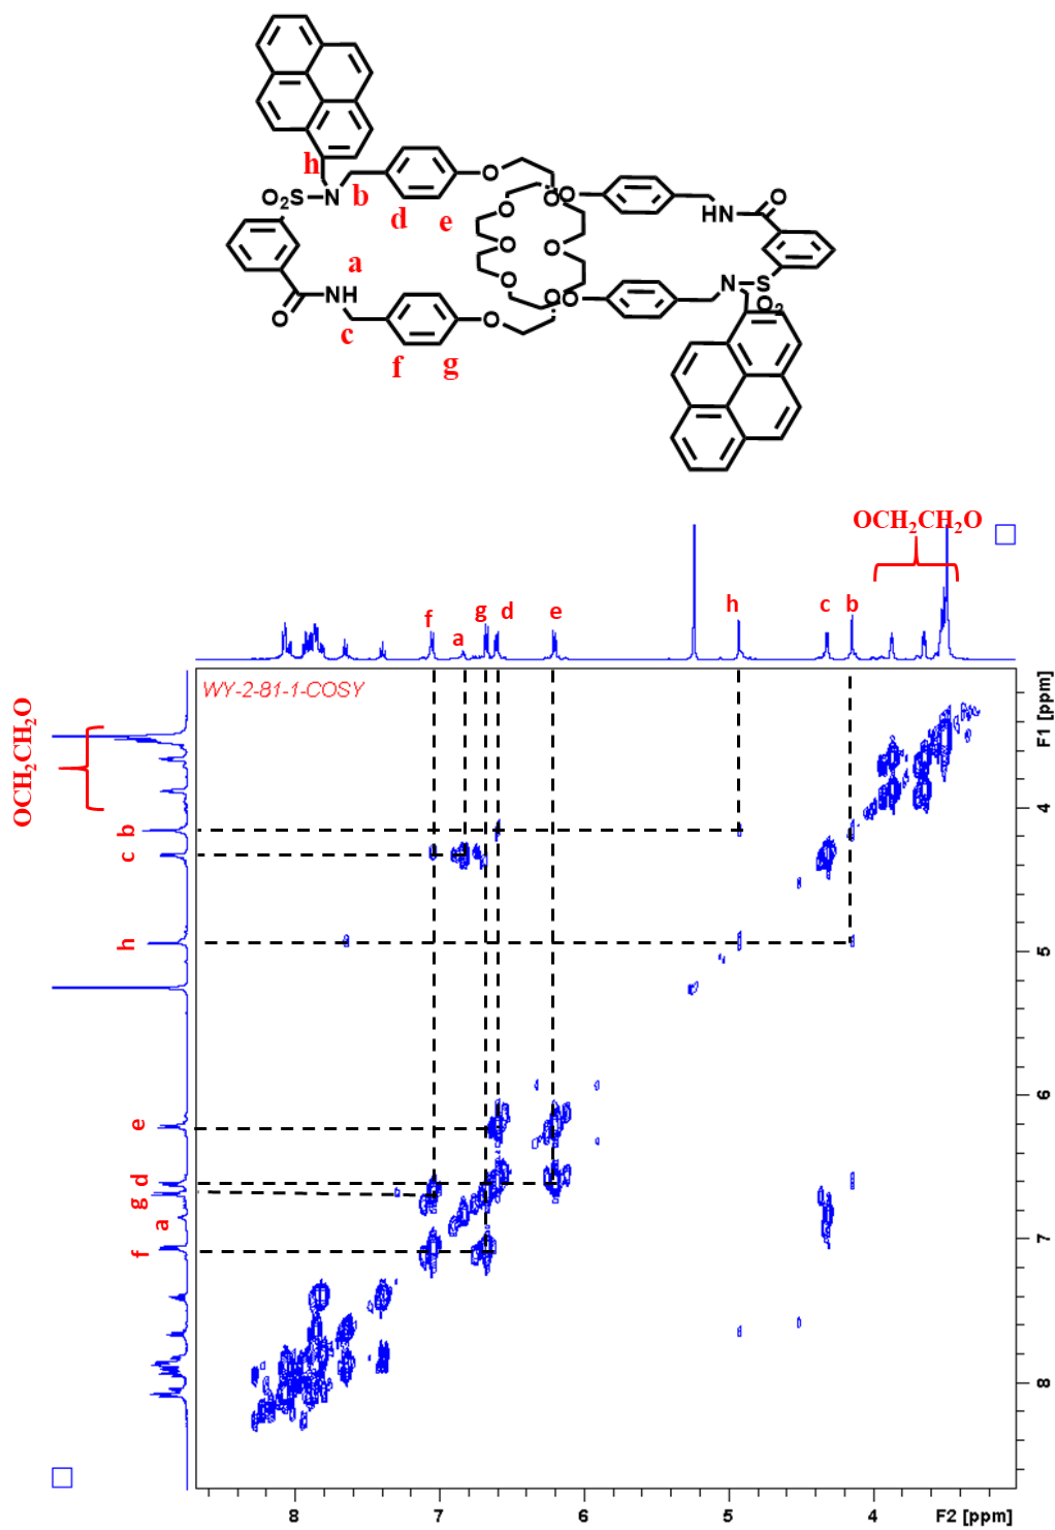

**Figure S33.** 2D  $^1\text{H}$ - $^1\text{H}$  COSY spectrum ( $\text{CD}_2\text{Cl}_2$ , 298 K, 400 MHz) of **7**.

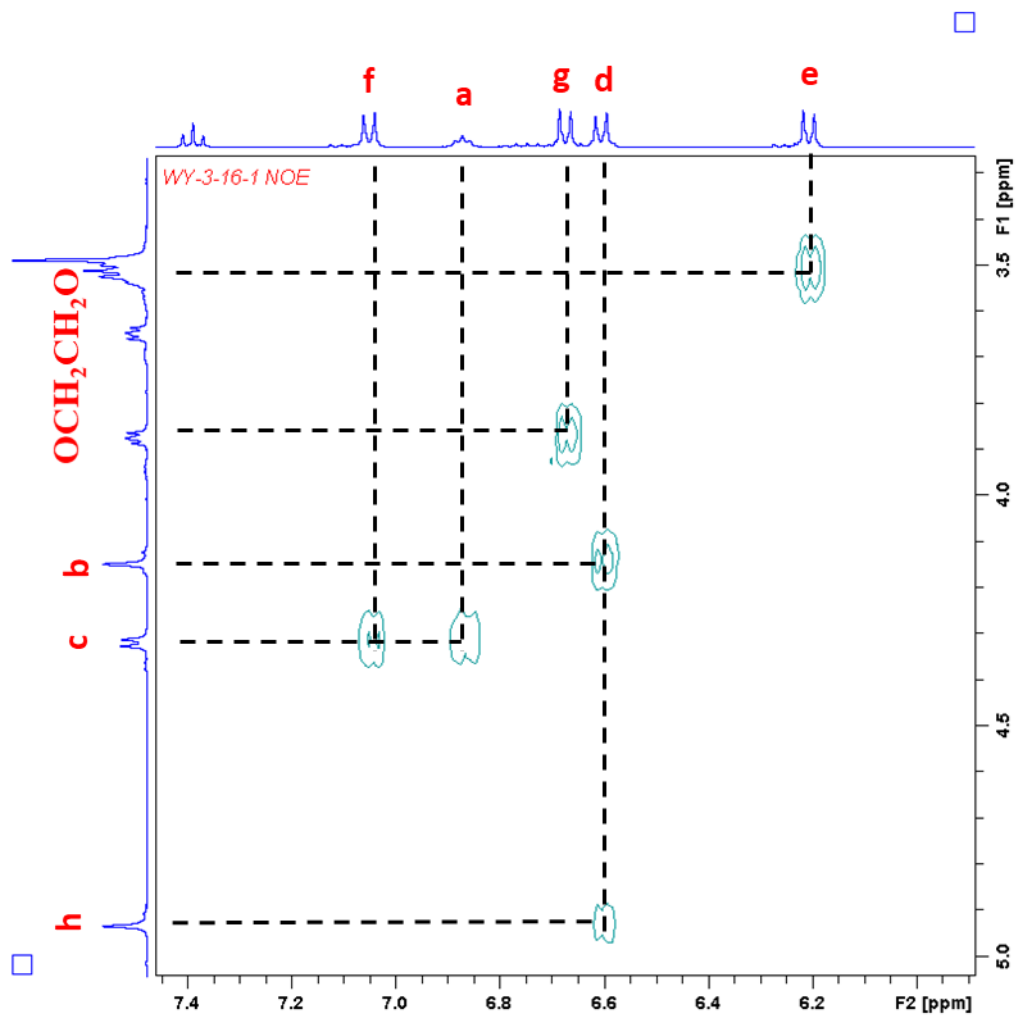

**Figure S34.** Partial 2D  $^1\text{H}$ - $^1\text{H}$  NOESY spectrum ( $\text{CD}_2\text{Cl}_2$ , 298 K, 400 MHz) of **7**.

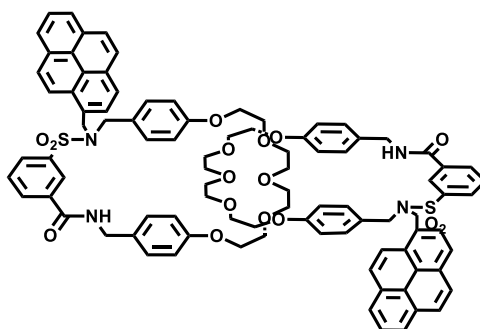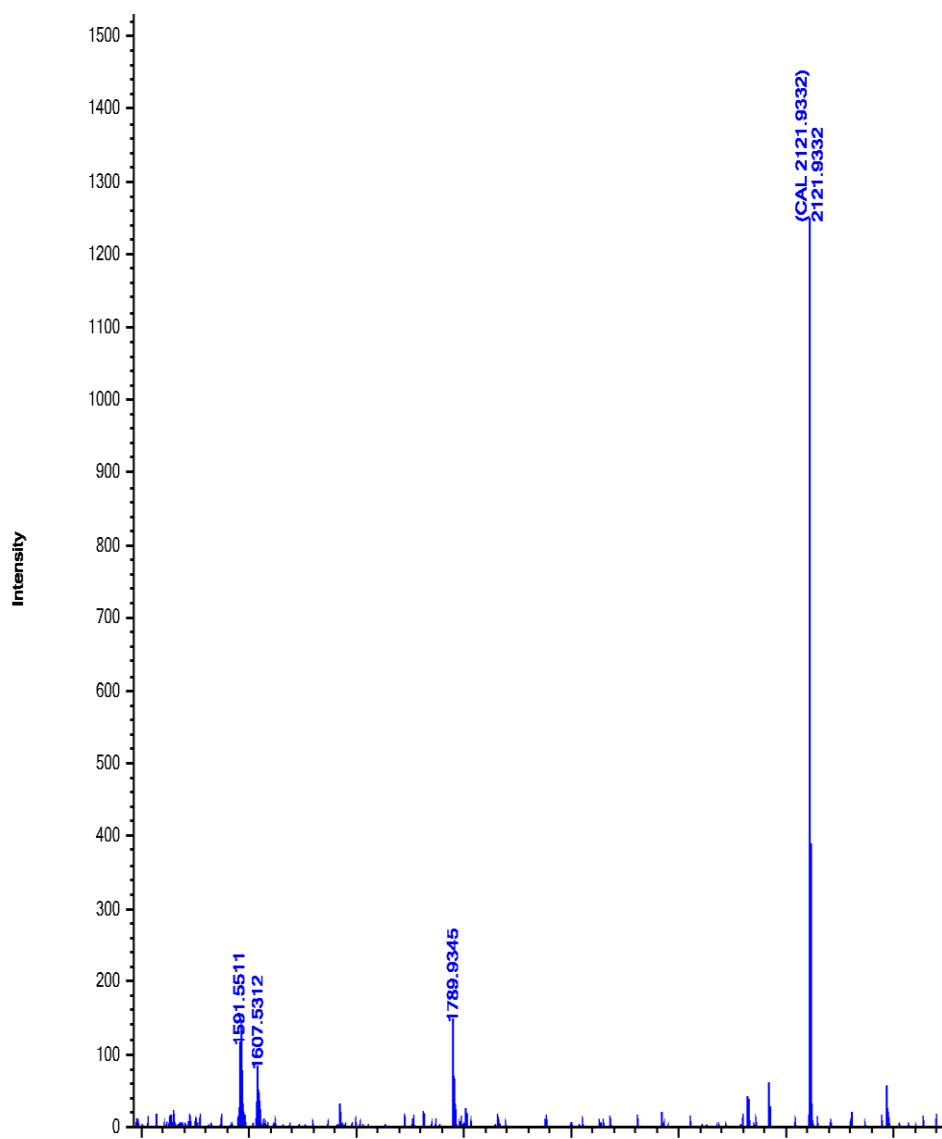

**Figure S35.** HRMS (ESI-TOF-MS) spectrum of **7**.

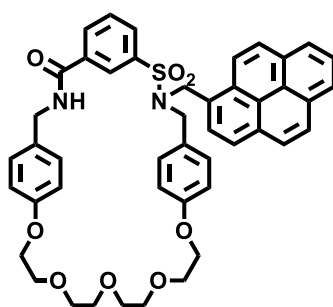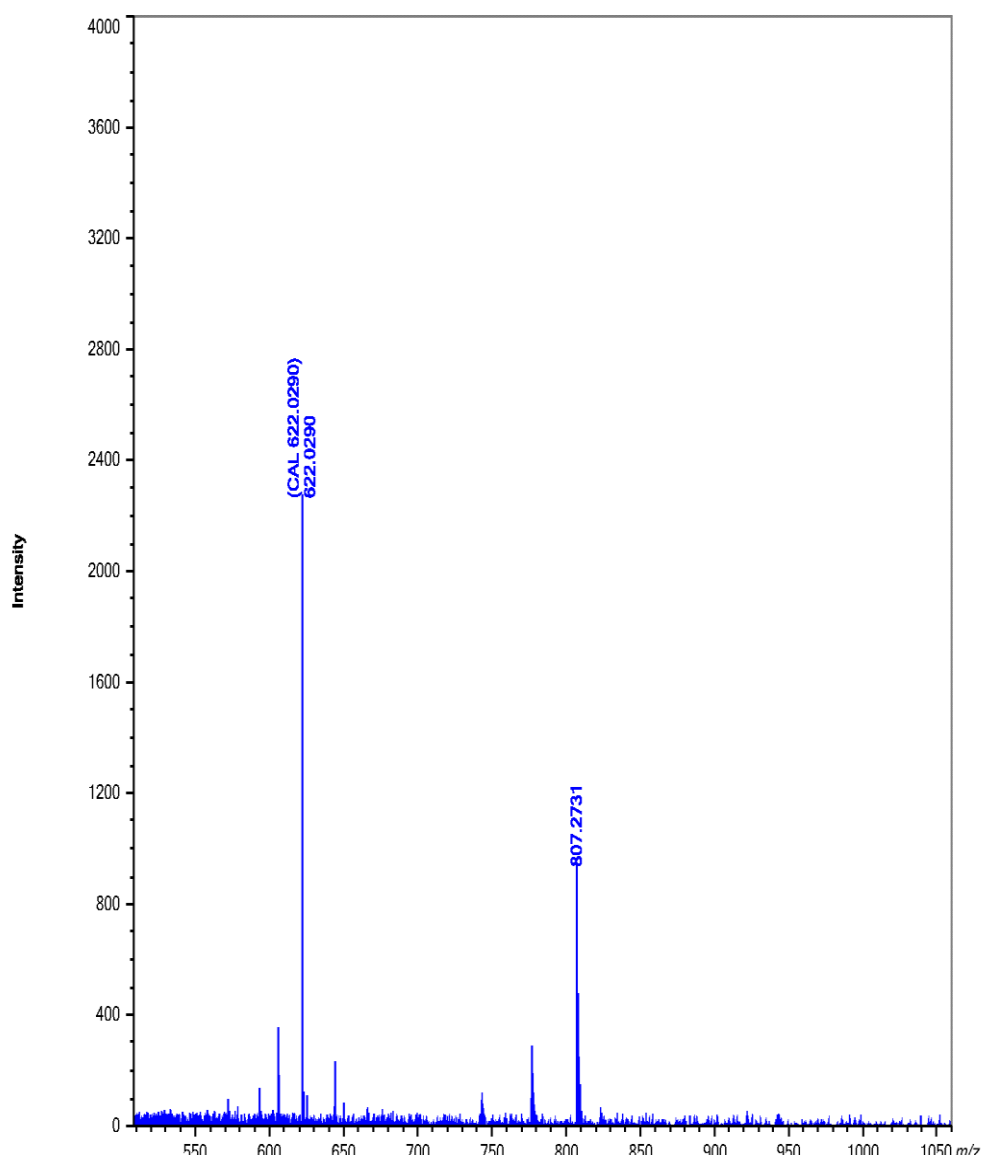

Figure S36. HRMS (ESI-TOF-MS) spectrum of 8.

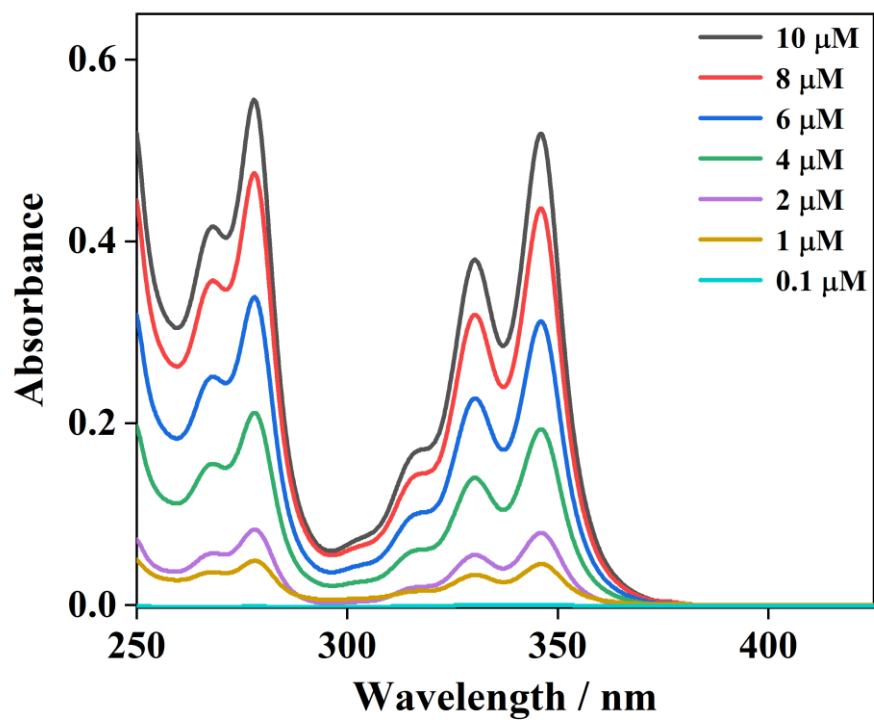

Figure S37. UV-vis absorption spectra of 7 in DCM at different concentration.

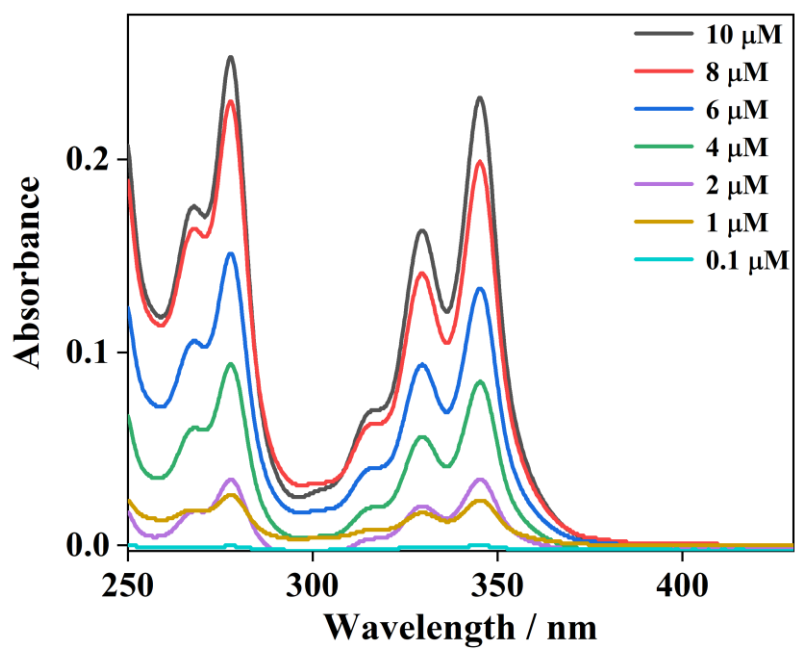

Figure S38. UV-vis absorption spectra of 8 in DCM at different concentration.



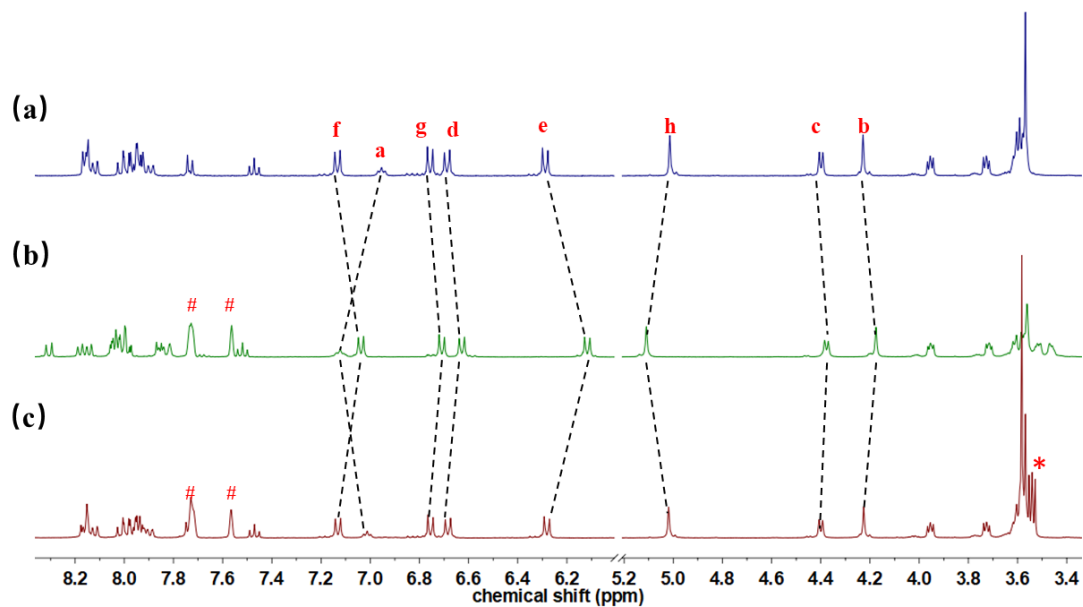

**Figure S39.** Partial  $^1\text{H}$  NMR spectra (400 MHz,  $\text{CD}_2\text{Cl}_2$ , 298 K) of (a) the [2]catenane **7** and (b) the solution in (a) after the addition of 1 equiv. of NaTFPB, and (c) the solution in (b) after the addition of 1 equiv. of [2.2.2]cryptand. #: Signals for the TFPB anion; \*: Signals for the [2.2.2]cryptand.

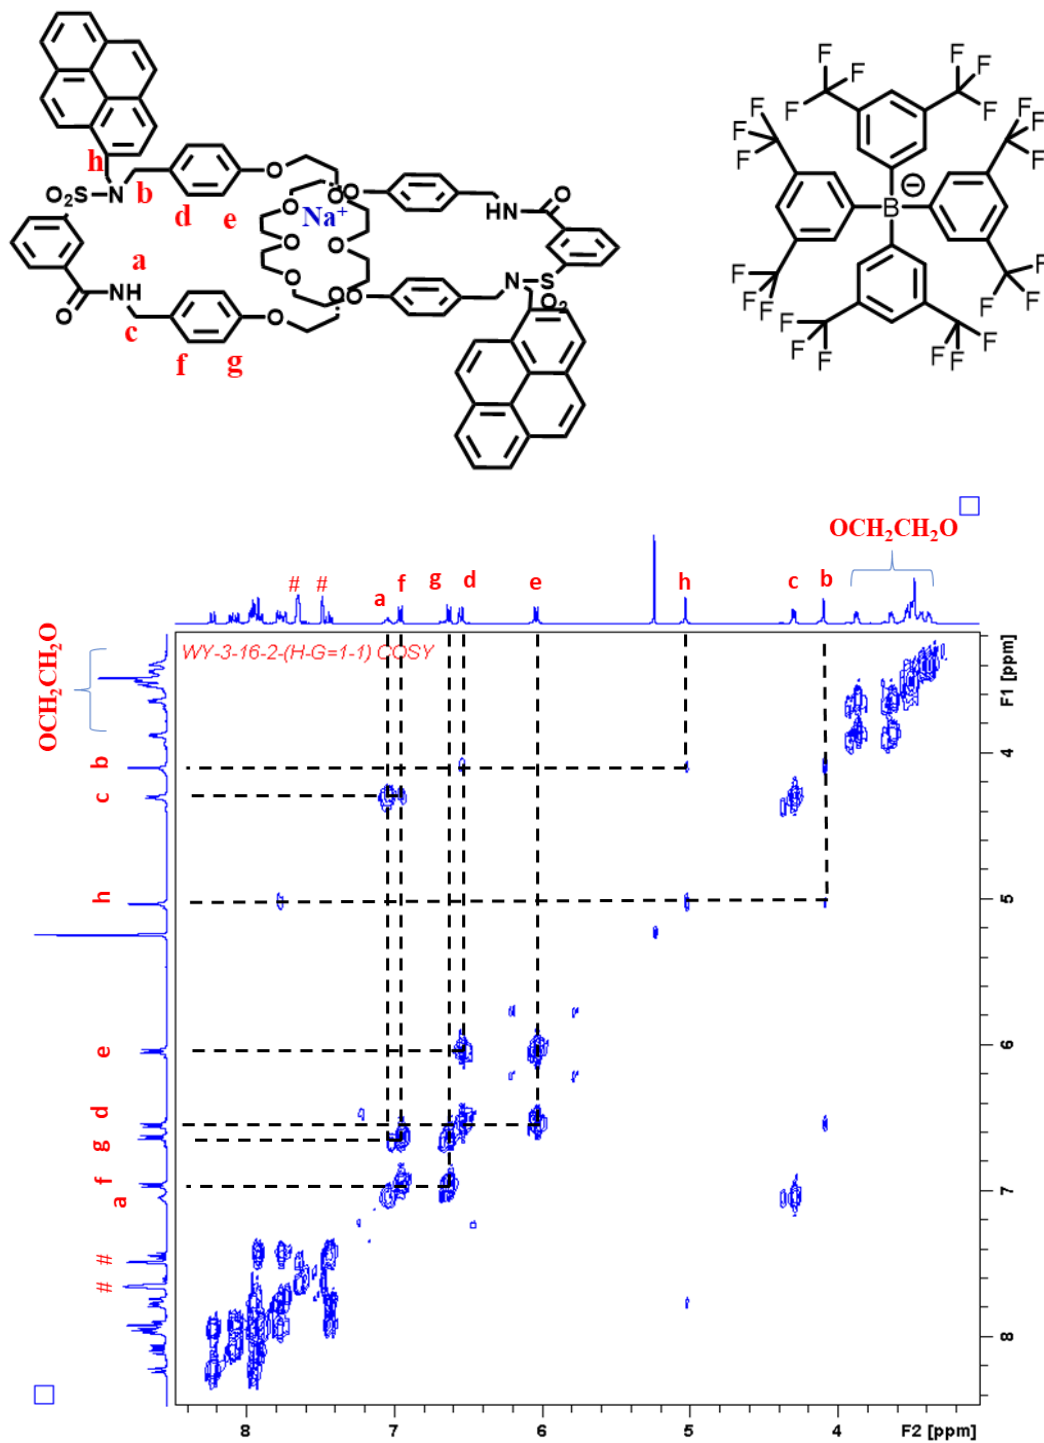

**Figure S40.** Partial 2D  $^1\text{H}$ - $^1\text{H}$  COSY spectrum ( $\text{CD}_2\text{Cl}_2$ , 298 K, 400 MHz) of **7**  $\supset$   $\text{Na}^+$  (1 eq.). #: Signals for the TFPB anion.

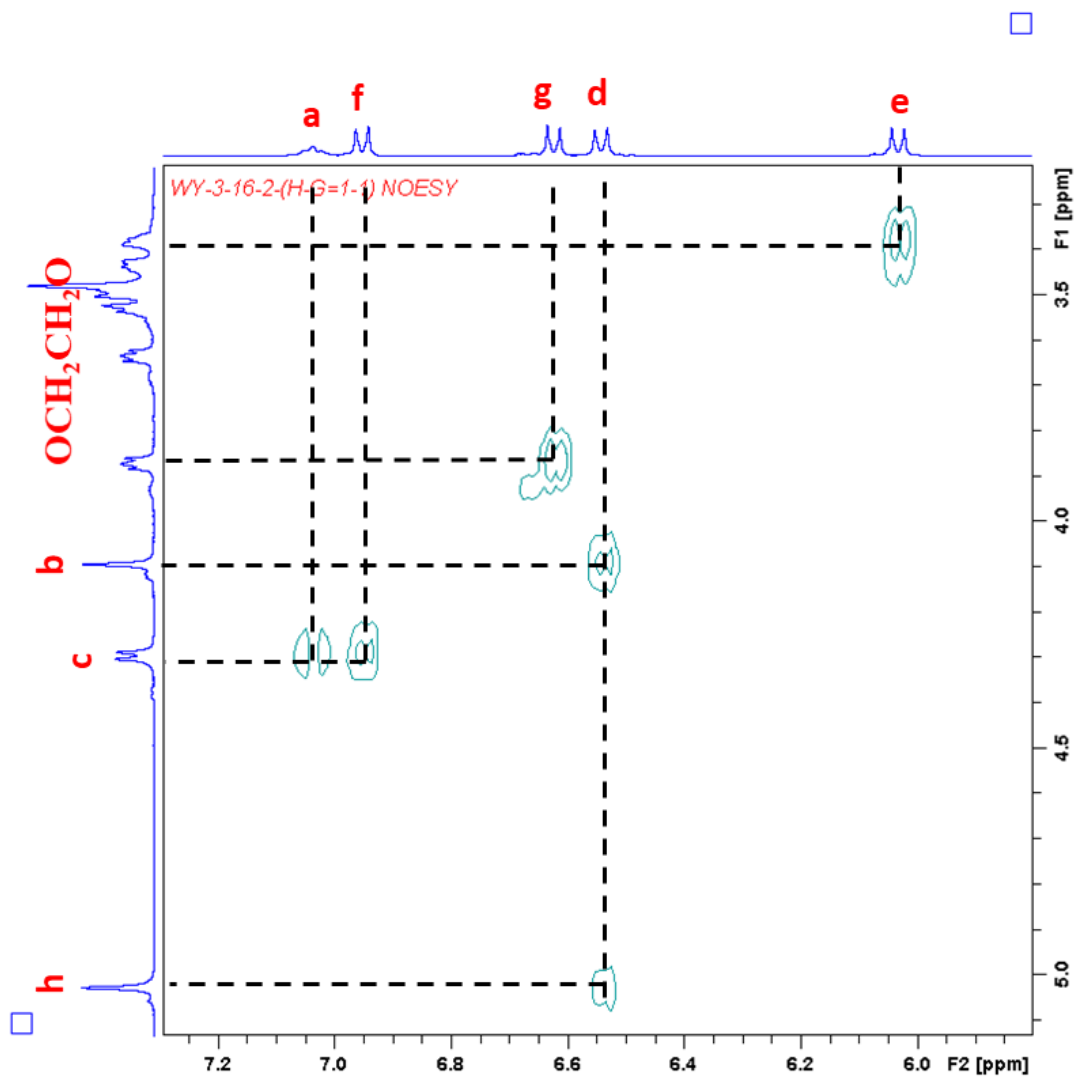

**Figure S41.** Partial 2D <sup>1</sup>H-<sup>1</sup>H NOESY spectrum (CD<sub>2</sub>Cl<sub>2</sub>, 298 K, 400 MHz) of **7** ⊃ Na<sup>+</sup> (1 eq.).

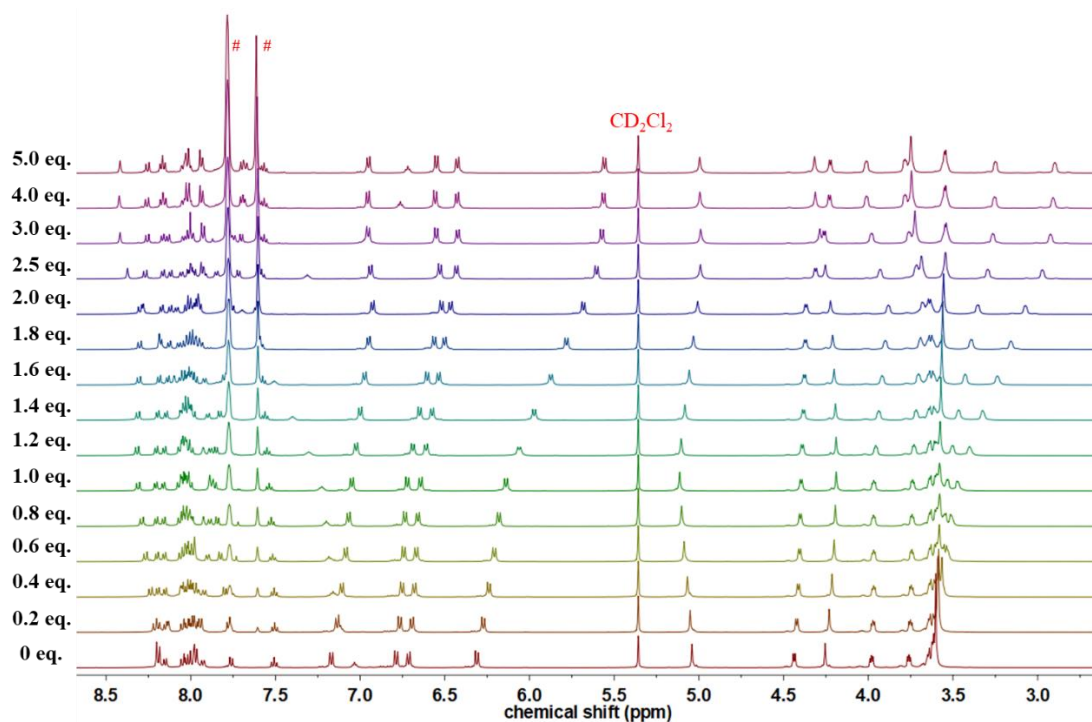

**Figure S42.** Stacked  $^1\text{H}$  NMR spectra (500 MHz, 298K) of [2]catetane 7 (10 mM) titrated by  $\text{Na}^+$  (0 -5.0 equiv.) in  $\text{CD}_2\text{Cl}_2$ . #: Signals for the TFPB anion.

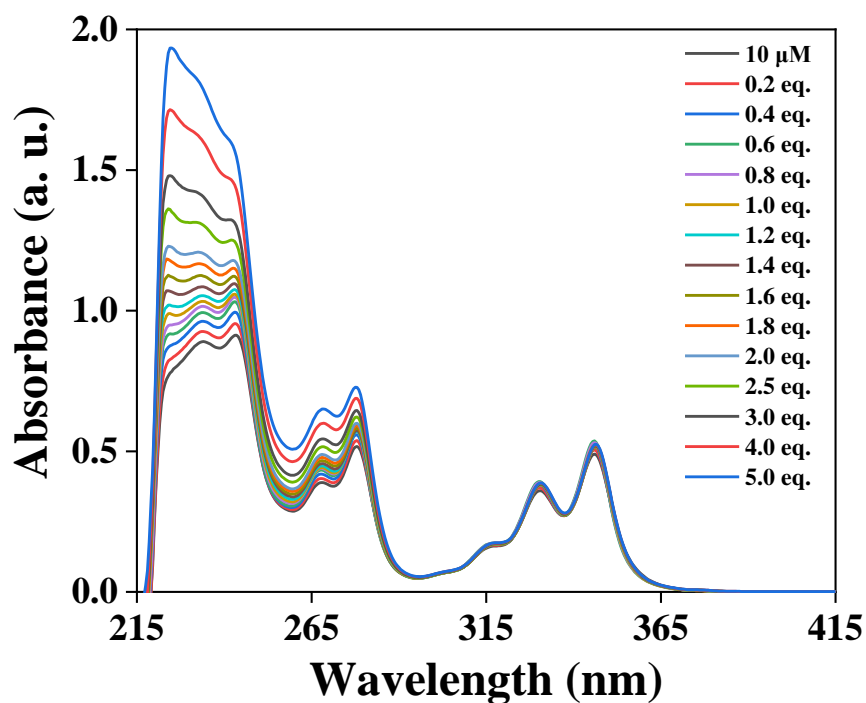

**Figure S43.** Stacked plots of UV-vis absorption spectra of [2]catetane 7 (10  $\mu\text{M}$ ) titrated by  $\text{Na}^+$  (0 -5.0 equiv.) in DCM.

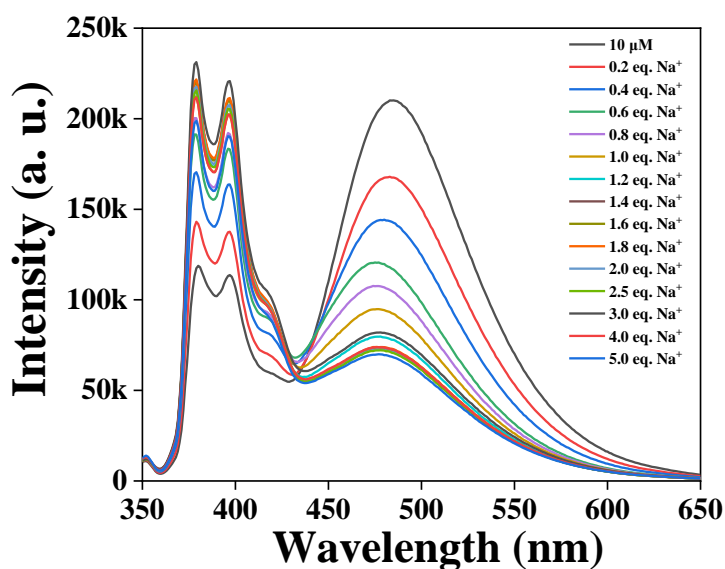

**Figure S44.** Stacked plots of emission spectra of [2]catenane **7** (10  $\mu\text{M}$ ) titrated by  $\text{Na}^+$  (0 -5.0 equiv.) in DCM. (Excitation, 330 nm; emission, 485 nm.)

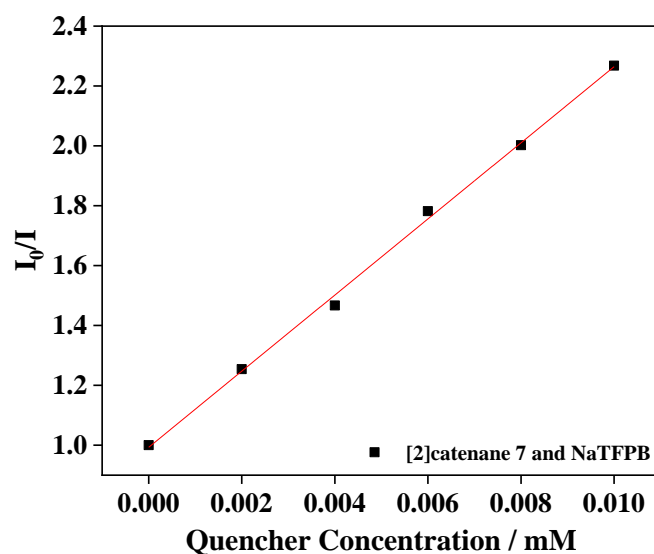

**Figure S45.** The Stern-Völmer plots of [2]catenane **7** titration with NaTFPB. (According to previous reports: *J. Am. Chem. Soc.* 2004, **126**, 14736; *J. Am. Chem. Soc.* 2017, **139**, 1554, the quenching constant ( $K_{\text{sv}}$ ) was calculated based on the fluorescence quenching titration results and the Stern-Völmer equation. In accordance with the Stern-Völmer equation, the measured absorbance  $I_0/I$  at 485 nm varied as a function of

concentration (mM) in a linear relationship ( $R^2 = 0.9982$ ), suggesting 1:1 stoichiometry of the interaction between  $\text{Na}^+$  and the host **7** in the range of not more than 1.0 eq.  $\text{Na}^+$ . The  $K_{\text{sv}}$  constant was calculated as  $127129 \pm 2707 \text{ M}^{-1}$  with NaTFPB.)

## Section E. DFT results and computational details

In order to verify the possibility of the bond breaking position of [2]catenanes **3** and **6**, we established model compound **S1**, and calculated the bond energies of its 6 chemical bonds.

**Table S1.** Bond energy analysis of radical fragments for model compound **S1**.

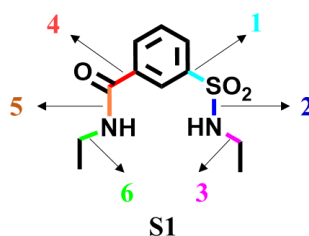

|                 | $\Delta H_{\text{S1}}$<br>(kcal/mol) | $\Delta H_{\text{radical1}}$<br>(kcal/mol) | $\Delta H_{\text{radical2}}$<br>(kcal/mol) | Bond<br>energy <sup>a</sup><br>(kcal/mol) |
|-----------------|--------------------------------------|--------------------------------------------|--------------------------------------------|-------------------------------------------|
| <b>S1</b>       | -1161.8                              |                                            |                                            |                                           |
| <b>Bond [1]</b> |                                      | -683.0                                     | -478.7                                     | 71.6                                      |
| <b>Bond [2]</b> |                                      | -134.4                                     | -1027.3                                    | 53.6                                      |
| <b>Bond [3]</b> |                                      | -79.1                                      | -1082.6                                    | 79.2                                      |
| <b>Bond [4]</b> |                                      | -247.8                                     | -913.9                                     | 95.6                                      |
| <b>Bond [5]</b> |                                      | -134.4                                     | -1027.3                                    | 90.5                                      |
| <b>Bond [6]</b> |                                      | -79.1                                      | -1082.6                                    | 87.0                                      |

<sup>a</sup>(Bond energy ( $\Delta H$ ) =  $\Delta H_{\text{radical1}}$  +  $\Delta H_{\text{radical2}}$  -  $\Delta H_{\text{S1}}$ )

## Cartesian Coordinates for All of the Calculated Structures

**S1**,  $E_{(\text{SCF Done})} = -1161.819322$

|   |              |              |              |
|---|--------------|--------------|--------------|
| C | -0.790583000 | -1.090276000 | 0.190757000  |
| C | -0.874779000 | -2.433616000 | -0.172760000 |
| C | 0.283580000  | -3.086730000 | -0.603278000 |
| C | 1.496316000  | -2.404188000 | -0.651847000 |
| C | 1.580728000  | -1.062072000 | -0.250618000 |

|   |              |              |              |
|---|--------------|--------------|--------------|
| C | 0.421923000  | -0.398929000 | 0.162583000  |
| H | -1.826645000 | -2.950028000 | -0.109875000 |
| H | 0.235730000  | -4.131233000 | -0.897068000 |
| H | 2.402633000  | -2.890926000 | -0.996269000 |
| H | 0.434832000  | 0.649352000  | 0.441939000  |
| C | 2.935232000  | -0.402035000 | -0.320873000 |
| O | 3.809317000  | -0.836046000 | -1.066465000 |
| N | -2.652131000 | 0.667579000  | -0.659071000 |
| H | -3.112759000 | 0.038282000  | -1.317709000 |
| N | 3.113669000  | 0.683783000  | 0.490223000  |
| H | 2.409845000  | 0.891103000  | 1.184506000  |
| C | 4.365499000  | 1.430031000  | 0.545064000  |
| H | 4.834586000  | 1.285500000  | 1.527911000  |
| H | 5.019737000  | 0.974786000  | -0.201070000 |
| C | -3.438370000 | 1.904199000  | -0.445843000 |
| H | -4.428618000 | 1.689474000  | -0.019577000 |
| H | -2.890196000 | 2.507632000  | 0.280500000  |
| C | -3.578232000 | 2.647535000  | -1.771787000 |
| H | -4.127762000 | 2.051612000  | -2.510928000 |
| H | -4.132650000 | 3.580015000  | -1.620610000 |
| H | -2.595385000 | 2.888199000  | -2.188873000 |
| C | 4.165938000  | 2.921390000  | 0.267698000  |
| H | 3.487206000  | 3.378841000  | 0.998093000  |
| H | 5.124120000  | 3.449831000  | 0.328005000  |
| H | 3.746738000  | 3.078422000  | -0.731517000 |
| S | -2.265244000 | -0.224783000 | 0.734282000  |
| O | -3.293505000 | -1.237827000 | 1.010248000  |
| O | -1.887283000 | 0.760658000  | 1.752641000  |

**Bond [1] radical<sub>1</sub>, E<sub>(SCF Done)</sub>=-683.007342**

|   |              |              |              |
|---|--------------|--------------|--------------|
| N | -0.473687000 | -0.527649000 | -0.126392000 |
| H | -0.504565000 | -1.425654000 | 0.349881000  |
| C | -1.549543000 | 0.428072000  | 0.167834000  |
| H | -1.451261000 | 0.827860000  | 1.187057000  |
| H | -1.437036000 | 1.273133000  | -0.516731000 |
| C | -2.909005000 | -0.237794000 | -0.026989000 |
| H | -3.038753000 | -1.088433000 | 0.653099000  |
| H | -3.708798000 | 0.479772000  | 0.184645000  |
| H | -3.025051000 | -0.598116000 | -1.053825000 |
| S | 1.120909000  | 0.008588000  | -0.281225000 |
| O | 1.971590000  | -1.057644000 | 0.304896000  |
| O | 1.190662000  | 1.425882000  | 0.161998000  |

**Bond [1] radical<sub>2</sub>, E<sub>(SCF Done)</sub>=-478.697923**

|   |              |              |              |
|---|--------------|--------------|--------------|
| C | 2.398018000  | -1.564952000 | -0.094284000 |
| C | 3.445889000  | -0.675154000 | -0.001669000 |
| C | 3.106404000  | 0.686413000  | 0.073976000  |
| C | 1.768609000  | 1.080008000  | 0.058790000  |
| C | 0.736482000  | 0.134167000  | -0.018078000 |
| C | 1.061855000  | -1.235666000 | -0.111181000 |
| H | 4.483887000  | -0.996424000 | 0.007006000  |
| H | 3.892199000  | 1.434904000  | 0.142151000  |
| H | 1.495317000  | 2.128788000  | 0.102253000  |
| H | 0.292491000  | -1.993899000 | -0.232953000 |
| C | -0.680383000 | 0.649167000  | -0.027414000 |
| O | -0.938029000 | 1.797565000  | -0.378174000 |
| N | -1.640687000 | -0.237574000 | 0.380453000  |
| H | -1.345555000 | -1.105353000 | 0.803994000  |



|   |              |              |              |
|---|--------------|--------------|--------------|
| C | -3.056052000 | 0.105248000  | 0.438833000  |
| H | -3.385944000 | 0.129450000  | 1.486788000  |
| H | -3.134612000 | 1.121419000  | 0.047200000  |
| C | -3.924324000 | -0.863909000 | -0.366324000 |
| H | -3.829170000 | -1.892194000 | 0.004370000  |
| H | -4.980370000 | -0.580441000 | -0.291336000 |
| H | -3.638194000 | -0.855686000 | -1.423140000 |

**Bond [2] radical<sub>1</sub>, E<sub>(SCF Done)</sub>=-134.420739**

|   |              |              |              |
|---|--------------|--------------|--------------|
| N | 1.325532000  | -0.269507000 | -0.114431000 |
| H | 1.197598000  | -1.088545000 | 0.502410000  |
| C | 0.140391000  | 0.543678000  | 0.045651000  |
| H | 0.202623000  | 1.049124000  | 1.028726000  |
| H | 0.159096000  | 1.338847000  | -0.710277000 |
| C | -1.185712000 | -0.231967000 | -0.026386000 |
| H | -1.249722000 | -0.977389000 | 0.775973000  |
| H | -2.039087000 | 0.448299000  | 0.073397000  |
| H | -1.277303000 | -0.754054000 | -0.984798000 |

**Bond [2] radical<sub>2</sub>, E<sub>(SCF Done)</sub>=-1027.313097**

|   |              |              |              |
|---|--------------|--------------|--------------|
| C | 1.660186000  | 0.250795000  | -0.084557000 |
| C | 2.131502000  | 1.561575000  | -0.014147000 |
| C | 1.197279000  | 2.596525000  | 0.061020000  |
| C | -0.167843000 | 2.313523000  | 0.054185000  |
| C | -0.628161000 | 0.990309000  | -0.007281000 |
| C | 0.299623000  | -0.053124000 | -0.098561000 |
| H | 3.198118000  | 1.758296000  | -0.004866000 |
| H | 1.538462000  | 3.625646000  | 0.123739000  |
| H | -0.906197000 | 3.107352000  | 0.091600000  |

|   |              |              |              |
|---|--------------|--------------|--------------|
| H | -0.008496000 | -1.089016000 | -0.191704000 |
| C | -2.122848000 | 0.777078000  | -0.007470000 |
| O | -2.882634000 | 1.680203000  | -0.345987000 |
| N | -2.552705000 | -0.457156000 | 0.389008000  |
| H | -1.885249000 | -1.098665000 | 0.793013000  |
| C | -3.964805000 | -0.821053000 | 0.444252000  |
| H | -4.262603000 | -0.967307000 | 1.491393000  |
| H | -4.513239000 | 0.043091000  | 0.064383000  |
| C | -4.273513000 | -2.075304000 | -0.375473000 |
| H | -3.703985000 | -2.941177000 | -0.016030000 |
| H | -5.338159000 | -2.323634000 | -0.300556000 |
| H | -4.028187000 | -1.920606000 | -1.431206000 |
| S | 2.851252000  | -1.104925000 | -0.275232000 |
| O | 4.135543000  | -0.649282000 | 0.325129000  |
| O | 2.168331000  | -2.350550000 | 0.174495000  |

**Bond [3] radical<sub>1</sub>, E<sub>(SCF Done)</sub>=-79.091826**

|   |              |              |              |
|---|--------------|--------------|--------------|
| C | 0.795448000  | 0.000004000  | -0.023361000 |
| H | 1.354029000  | -0.927709000 | 0.051459000  |
| H | 1.354368000  | 0.927439000  | 0.051671000  |
| C | -0.694382000 | 0.000074000  | -0.000706000 |
| H | -1.109783000 | -0.886012000 | -0.496804000 |
| H | -1.095416000 | -0.003514000 | 1.029165000  |
| H | -1.109591000 | 0.889328000  | -0.491090000 |

**Bond [3] radical<sub>2</sub>, E<sub>(SCF Done)</sub>=-1082.601244**

|   |              |             |              |
|---|--------------|-------------|--------------|
| C | -1.430842000 | 0.412352000 | -0.054133000 |
| C | -1.824538000 | 1.751021000 | -0.079851000 |
| C | -0.836865000 | 2.736315000 | -0.042889000 |

|   |              |              |              |
|---|--------------|--------------|--------------|
| C | 0.509533000  | 2.379053000  | 0.007510000  |
| C | 0.897434000  | 1.031904000  | 0.001096000  |
| C | -0.087440000 | 0.038670000  | -0.018100000 |
| H | -2.876862000 | 2.008566000  | -0.132657000 |
| H | -1.120713000 | 3.784345000  | -0.055506000 |
| H | 1.289306000  | 3.132013000  | 0.050913000  |
| H | 0.162095000  | -1.016411000 | 0.014387000  |
| C | 2.377538000  | 0.739151000  | 0.047204000  |
| O | 3.168914000  | 1.580070000  | 0.464739000  |
| N | -3.050079000 | -1.041209000 | 1.555019000  |
| H | -3.771092000 | -1.782537000 | 1.571428000  |
| N | 2.760544000  | -0.492888000 | -0.401753000 |
| H | 2.078255000  | -1.078144000 | -0.862192000 |
| C | 4.152666000  | -0.929037000 | -0.418817000 |
| H | 4.487149000  | -1.040069000 | -1.459234000 |
| H | 4.728157000  | -0.115058000 | 0.026233000  |
| C | 4.361318000  | -2.236406000 | 0.347938000  |
| H | 3.763916000  | -3.052115000 | -0.077623000 |
| H | 5.414050000  | -2.537441000 | 0.303482000  |
| H | 4.079075000  | -2.120222000 | 1.399376000  |
| S | -2.675959000 | -0.866166000 | -0.074685000 |
| O | -3.878912000 | -0.348496000 | -0.743141000 |
| O | -2.053010000 | -2.122041000 | -0.521130000 |

**Bond [4] radical<sub>1</sub>,  $E_{(\text{SCF Done})} = -247.75747$**

|   |              |              |              |
|---|--------------|--------------|--------------|
| C | -1.428708000 | 0.313629000  | -0.302894000 |
| O | -1.881091000 | -0.739681000 | 0.072973000  |
| N | -0.209297000 | 0.838585000  | -0.086778000 |
| H | -0.003001000 | 1.721585000  | -0.531865000 |

|   |             |              |              |
|---|-------------|--------------|--------------|
| C | 0.879481000 | 0.134937000  | 0.611641000  |
| H | 1.349864000 | 0.836775000  | 1.310754000  |
| H | 0.402410000 | -0.651831000 | 1.201283000  |
| C | 1.917968000 | -0.455167000 | -0.343273000 |
| H | 2.388386000 | 0.325654000  | -0.952682000 |
| H | 2.709194000 | -0.962681000 | 0.220828000  |
| H | 1.454504000 | -1.182531000 | -1.017496000 |

**Bond [4] radical<sub>2</sub>, E<sub>(SCF Done)</sub>=-913.90945**

|   |              |              |              |
|---|--------------|--------------|--------------|
| C | -1.019279000 | 0.115089000  | 0.107429000  |
| C | -1.922003000 | 0.682763000  | -0.793383000 |
| C | -3.202667000 | 0.137067000  | -0.925128000 |
| C | -3.579796000 | -0.972424000 | -0.153670000 |
| C | -2.637967000 | -1.474810000 | 0.721133000  |
| C | -1.365209000 | -0.989937000 | 0.904216000  |
| H | -1.621802000 | 1.550127000  | -1.370864000 |
| H | -3.909644000 | 0.577506000  | -1.623450000 |
| H | -4.572298000 | -1.404914000 | -0.245245000 |
| H | -0.660366000 | -1.408620000 | 1.615419000  |
| N | 1.572190000  | -0.330671000 | -0.503626000 |
| H | 1.507853000  | -0.163428000 | -1.508289000 |
| C | 2.978623000  | -0.442770000 | -0.055151000 |
| H | 3.543182000  | 0.480583000  | -0.247829000 |
| H | 2.956567000  | -0.595720000 | 1.025636000  |
| C | 3.638650000  | -1.627133000 | -0.756596000 |
| H | 3.666827000  | -1.485988000 | -1.844172000 |
| H | 4.672028000  | -1.737570000 | -0.410566000 |
| H | 3.097915000  | -2.555097000 | -0.545905000 |
| S | 0.619253000  | 0.834788000  | 0.283406000  |

|   |             |             |              |
|---|-------------|-------------|--------------|
| O | 0.624930000 | 2.100496000 | -0.464009000 |
| O | 1.008100000 | 0.791271000 | 1.695639000  |

**Bond [5] radical<sub>1</sub>,  $E_{(\text{SCF Done})}=-134.420735$**

|   |              |              |              |
|---|--------------|--------------|--------------|
| N | 1.325303000  | -0.269646000 | -0.114592000 |
| H | 1.196998000  | -1.088014000 | 0.503155000  |
| C | 0.140424000  | 0.543793000  | 0.045720000  |
| H | 0.202716000  | 1.048726000  | 1.029056000  |
| H | 0.158946000  | 1.339081000  | -0.710079000 |
| C | -1.185480000 | -0.231966000 | -0.026384000 |
| H | -1.249928000 | -0.977284000 | 0.776060000  |
| H | -2.038953000 | 0.448288000  | 0.072696000  |
| H | -1.276568000 | -0.754240000 | -0.984763000 |

**Bond [5] radical<sub>2</sub>,  $E_{(\text{SCF Done})}=-1027.254423$**

|   |              |              |              |
|---|--------------|--------------|--------------|
| C | 0.232970000  | -0.606739000 | -0.028858000 |
| C | 0.573849000  | -1.267287000 | -1.213083000 |
| C | 1.867451000  | -1.138767000 | -1.723052000 |
| C | 2.807614000  | -0.358487000 | -1.052225000 |
| C | 2.456516000  | 0.294150000  | 0.141282000  |
| C | 1.161776000  | 0.167560000  | 0.660775000  |
| H | -0.164905000 | -1.880395000 | -1.718823000 |
| H | 2.138942000  | -1.651680000 | -2.641115000 |
| H | 3.818160000  | -0.246895000 | -1.433520000 |
| H | 0.891348000  | 0.654910000  | 1.591447000  |
| C | 3.447705000  | 1.122622000  | 0.873658000  |
| O | 4.580866000  | 1.343413000  | 0.569686000  |
| N | -2.336873000 | 0.149945000  | -0.437278000 |
| H | -3.226021000 | -0.331426000 | -0.572708000 |

|   |              |              |              |
|---|--------------|--------------|--------------|
| C | -2.485883000 | 1.585135000  | -0.127391000 |
| H | -2.935700000 | 1.739769000  | 0.861534000  |
| H | -1.480609000 | 2.019395000  | -0.099734000 |
| C | -3.315267000 | 2.259502000  | -1.217035000 |
| H | -4.327861000 | 1.840055000  | -1.262360000 |
| H | -3.409691000 | 3.330098000  | -1.007665000 |
| H | -2.848569000 | 2.135194000  | -2.199164000 |
| S | -1.428001000 | -0.794097000 | 0.632307000  |
| O | -1.875841000 | -2.169346000 | 0.394024000  |
| O | -1.421195000 | -0.211467000 | 1.979006000  |

**Bond [6] radical<sub>1</sub>, E<sub>(SCF Done)</sub>=-79.091825**

|   |              |              |              |
|---|--------------|--------------|--------------|
| C | 0.795387000  | 0.000009000  | -0.023346000 |
| H | 1.353851000  | -0.927775000 | 0.051477000  |
| H | 1.354525000  | 0.927332000  | 0.051580000  |
| C | -0.694358000 | 0.000102000  | -0.000710000 |
| H | -1.109727000 | -0.884617000 | -0.499252000 |
| H | -1.095328000 | -0.006294000 | 1.029184000  |
| H | -1.109496000 | 0.890692000  | -0.488655000 |

**Bond [6] radical<sub>2</sub>, E<sub>(SCF Done)</sub>=-1082.288786**

|   |              |              |              |
|---|--------------|--------------|--------------|
| C | -0.081621000 | 0.871431000  | 0.055256000  |
| C | -0.538816000 | 2.069199000  | -0.495015000 |
| C | -1.888474000 | 2.188527000  | -0.842785000 |
| C | -2.758994000 | 1.123226000  | -0.635438000 |
| C | -2.289643000 | -0.075091000 | -0.073819000 |
| C | -0.941723000 | -0.203781000 | 0.276994000  |
| H | 0.155411000  | 2.890735000  | -0.635752000 |
| H | -2.254965000 | 3.116842000  | -1.270583000 |

|   |              |              |              |
|---|--------------|--------------|--------------|
| H | -3.809184000 | 1.198047000  | -0.898675000 |
| H | -0.575627000 | -1.127873000 | 0.710124000  |
| C | -3.248784000 | -1.185879000 | 0.160745000  |
| O | -4.427145000 | -1.152601000 | -0.229300000 |
| N | 2.214224000  | -0.385046000 | -0.618216000 |
| H | 2.460314000  | 0.130957000  | -1.463102000 |
| N | -2.764171000 | -2.346951000 | 0.715548000  |
| H | -3.553181000 | -2.849146000 | 1.141253000  |
| C | 3.297323000  | -1.299245000 | -0.190750000 |
| H | 4.221237000  | -0.753127000 | 0.046209000  |
| H | 2.959926000  | -1.787166000 | 0.725611000  |
| C | 3.551970000  | -2.327136000 | -1.290306000 |
| H | 3.890817000  | -1.849068000 | -2.217733000 |
| H | 4.333915000  | -3.025721000 | -0.973631000 |
| H | 2.642921000  | -2.895513000 | -1.510192000 |
| S | 1.645739000  | 0.724683000  | 0.530870000  |
| O | 2.262022000  | 2.042473000  | 0.323288000  |
| O | 1.719972000  | 0.049201000  | 1.828753000  |

## Section F. References

- [1] M. J. Barrell, D. A. Leigh, P. J. Lusby, A. M. Z. Slawin, *Angew. Chem. Int. Ed.* **2008**, *47*, 8036-8039.
- [2] M. Muraoka, H. Irie, Y. Nakatsuji, *Org. Biomol. Chem.* **2010**, *8*, 2408-2413.
- [3] S. Chen, Y. Zhao, C. Bao, Y. Zhou, C. Wang, Q. Lin, L. Zhu, *Chem. Commun.* **2018**, *54*, 1249-1252.
- [4] M. Frisch, G. Trucks, H. Schlegel, G. Scuseria, M. Robb, J. Heeseman, G. Scalmani, V. Barone, B. Mennucci, G. Petersson, H. Nakatsuji, M. Caricato, X. Li, H. Hratchian, A. Izmaylov, J. Bloino, G. Zheng, J. Sonnenberg, M. Hada, M. Ehara, K. Toyota, R. Fukuda, J. Hasegawa, M. Ishida, T. Nakajima, Y. Honda, O. Kitao, H. Nakai, T. Vreven, J. Montgomery, J. Peralta, F. Ogliaro, M. Bearpark, J. Heyd, E. Brothers, K. Kudin, V. Staroverov, R. Kobayashi, J. Normand, K. Raghavachari, A. Rendell, J. Burant, S. Iyengar, J. Tomasi, M. Cossi, N. Rega, N. Milam, M. Klene, J. Knox, J. Cross, V. Bskken, C. Adamo, J. Jaramillo, R. Gomperts, R. Stratmann, O. Yazyev, A. Austin, R. Cammi, C. Pomelli, J. Ochterski, R. Marin, K. Morokuma, V. Zakrzewski, G. Voth, P. Salvador, J. Dannenberg, S. Dapprich, A. Daniels, O. Farkas, J. Foresman, J. Ortiz, J. Cioslowski, D. Fox, *Gaussian 09, Revision A.02*, Gaussian, Inc., Wallingford, CT, **2009**.
- [5] A. Becke, *J. Chem. Phys.* **1993**, *98*, 5648-5653.
- [6] C. Lee, W. Yang, *Phys. Rev. B* **1988**, *37*, 785-789.
- [7] J. Perdew, K. Burke, Y. Wang, *Phys. Rev. B* **1996**, *54*, 16533-16539.
